# Supplementary material for: A series of π-expanded coplanar BODIPY dyes with deep-red emission: Synthesis, optical properties, and application in amplified spontaneous emission
Source: Royal Society of Chemistry journal article supplement (doi:10.1039/d3nj01667f), 2023-01-01
Supplement: d3nj01667f1.pdf [file d3nj01667f1.pdf]

## Supporting Information

### Content:

Page S2: Table S1. Photophysical parameters of B1-B5 upon various solvents.

Pages S3-6: Absorption and emission spectra of B1-B5 upon various solvents.

Page S7: Table S2. OPA and TPA values of B1, B2, B4, and B5.

Pages S8-11: Emission decay result of B3-B5.

Pages S12-16: NMR spectra of B1-B5.

Pages S17-43: One photon absorption (OPA) and two photon absorption (OPA) TD-DFT calculation result of B1, B2, B4, and B5 calculated at RB3LYP/6-31G(d) level.

Table S1-1. Photophysical parameters of B1 upon various solvents.

| solvent (polarity)                    | $\lambda_{\text{abs}}$ (nm) | $\lambda_{\text{em}}$ (nm) | FWHM(nm) | $\Phi$ | $\tau$ (ns) |
|---------------------------------------|-----------------------------|----------------------------|----------|--------|-------------|
| Hexane (0.06)                         | 570                         | N/A                        | N/A      | N/A    | N/A         |
|                                       |                             |                            |          | A      |             |
| Toluene (2.4)                         | 574                         | N/A                        | N/A      | N/A    | N/A         |
|                                       |                             |                            |          | A      |             |
| CH <sub>2</sub> Cl <sub>2</sub> (3.4) | 577                         | N/A                        | N/A      | N/A    | N/A         |
|                                       |                             |                            |          | A      |             |
| THF (4.2)                             | 573                         | N/A                        | N/A      | N/A    | N/A         |
|                                       |                             |                            |          | A      |             |
| MeCN (6.2)                            | 568                         | N/A                        | N/A      | N/A    | N/A         |
|                                       |                             |                            |          | A      |             |

Table S1-2. Photophysical parameters of B2 upon various solvents.

| solvent (polarity)                    | $\lambda_{\text{abs}}$ (nm) | $\lambda_{\text{em}}$ (nm) | FWHM(nm) | $\Phi$ | $\tau$ (ns) |
|---------------------------------------|-----------------------------|----------------------------|----------|--------|-------------|
| Hexane (0.06)                         | 755                         | N/A                        | N/A      | N/A    | N/A         |
| Toluene (2.4)                         | 760                         | N/A                        | N/A      | N/A    | N/A         |
| CH <sub>2</sub> Cl <sub>2</sub> (3.4) | 767                         | 788                        | 24.2     | <0.01  | N/A         |
| THF (4.2)                             | 762                         | N/A                        | N/A      | N/A    | N/A         |
| MeCN (6.2)                            | 764                         | N/A                        | N/A      | N/A    | N/A         |

Table S1-3. Photophysical parameters of B3 upon various solvents.

| solvent (polarity)                    | $\lambda_{\text{abs}}$ (nm) | $\lambda_{\text{em}}$ (nm) | FWHM(nm) | $\Phi$ | $\tau$ (ns) |
|---------------------------------------|-----------------------------|----------------------------|----------|--------|-------------|
| Hexane (0.06)                         | 762                         | N/A                        | N/A      | N/A    | N/A         |
| Toluene (2.4)                         | 769                         | N/A                        | N/A      | N/A    | N/A         |
| CH <sub>2</sub> Cl <sub>2</sub> (3.4) | 780                         | 793                        | 24.8     | 0.02   | 3.2         |
| THF (4.2)                             | 773                         | 796                        | 25.0     | <0.01  | N/A         |
| MeCN (6.2)                            | 775                         | N/A                        | N/A      | N/A    | N/A         |

Table S1-4. Photophysical parameters of B4 upon various solvents.

| solvent (polarity)                    | $\lambda_{\text{abs}}$ (nm) | $\lambda_{\text{em}}$ (nm) | FWHM(nm) | $\Phi$ | $\tau^a$ (ns) |
|---------------------------------------|-----------------------------|----------------------------|----------|--------|---------------|
| Hexane (0.06)                         | 611                         | 624                        | 22.0     | 0.79   | 29.4          |
| Toluene (2.4)                         | 617                         | 629                        | 21.2     | 0.97   | 35.8          |
| CH <sub>2</sub> Cl <sub>2</sub> (3.4) | 626                         | 648                        | 21.8     | 0.99   | 36.4          |
| THF (4.2)                             | 620                         | 645                        | 23.0     | 0.85   | 31.1          |
| MeCN (6.2)                            | 619                         | 646                        | 23.6     | 0.77   | 28.5          |

a, fitted with single exponential decay equation  $y=y_0+c*e^{(-x/t)}$

Table S1-5. Photophysical parameters of B5 upon various solvents.

| solvent (polarity)                    | $\lambda_{\text{abs}}$ (nm) | $\lambda_{\text{em}}$ (nm) | FWHM(nm) | $\Phi$ | $\tau^a$ (ns) |
|---------------------------------------|-----------------------------|----------------------------|----------|--------|---------------|
| Hexane (0.06)                         | 611                         | 625                        | 22.6     | 0.69   | 24.5          |
| Toluene (2.4)                         | 619                         | 631                        | 23.5     | 0.94   | 33.1          |
| CH <sub>2</sub> Cl <sub>2</sub> (3.4) | 621                         | 636                        | 22.0     | 0.97   | 34.9          |
| THF (4.2)                             | 618                         | 632                        | 25.0     | 0.81   | 29.4          |

---

|            |     |     |      |      |      |
|------------|-----|-----|------|------|------|
| MeCN (6.2) | 614 | 635 | 24.6 | 0.62 | 22.0 |
|------------|-----|-----|------|------|------|

---

a, fitted with single exponential decay equation  $y=y_0+c*e^{(-x/t)}$

Figure S1-1. Absorption spectra of B1 upon various solvents.

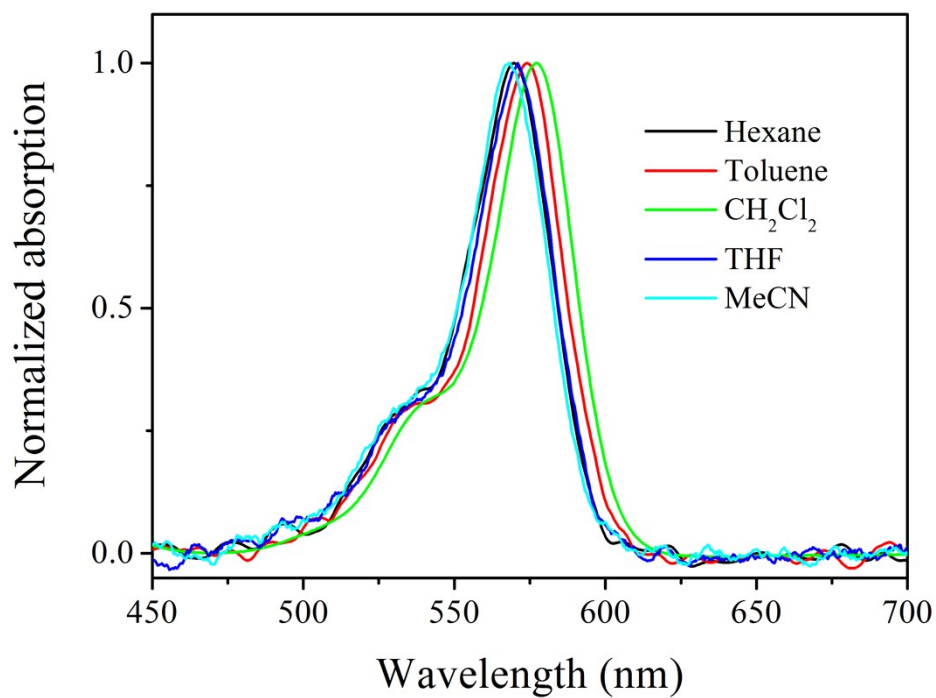

Figure S1-2. Absorption spectra of B2 upon various solvents.

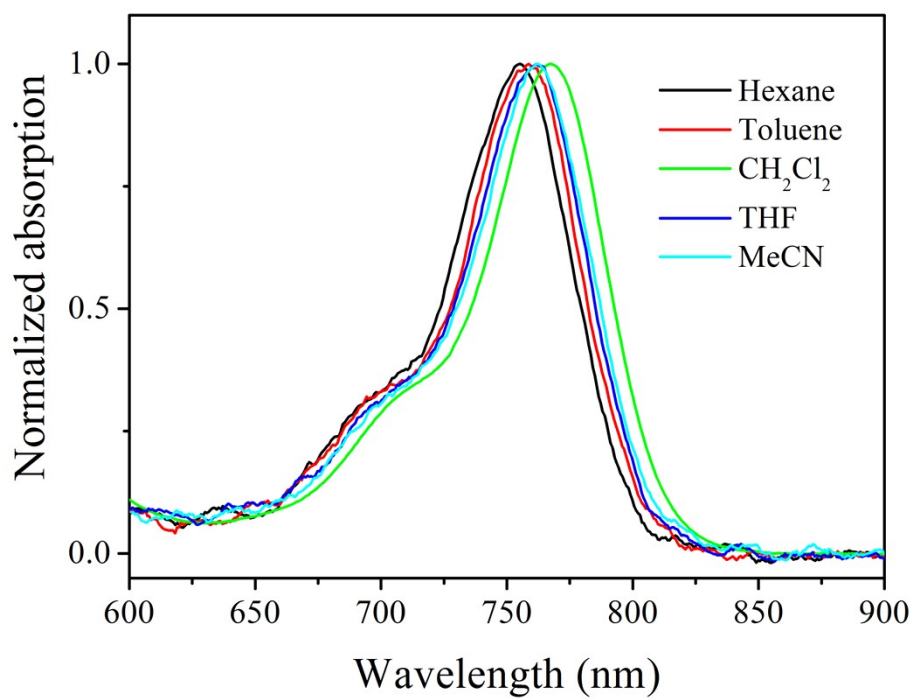

Figure S1-3. Absorption spectra of B3 upon various solvents.

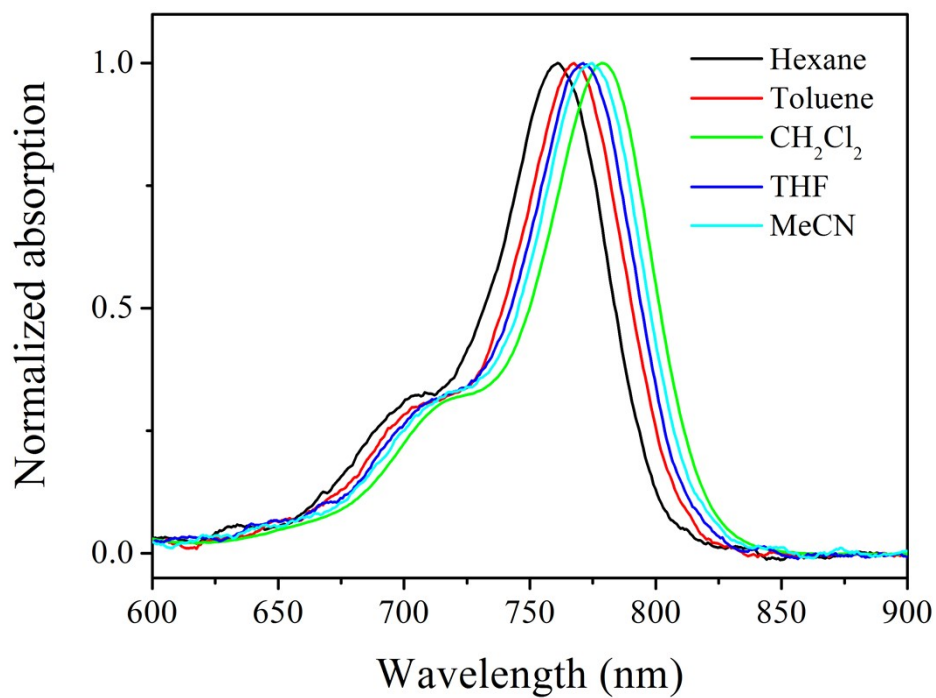

Figure S1-4. Absorption spectra of B4 upon various solvents.

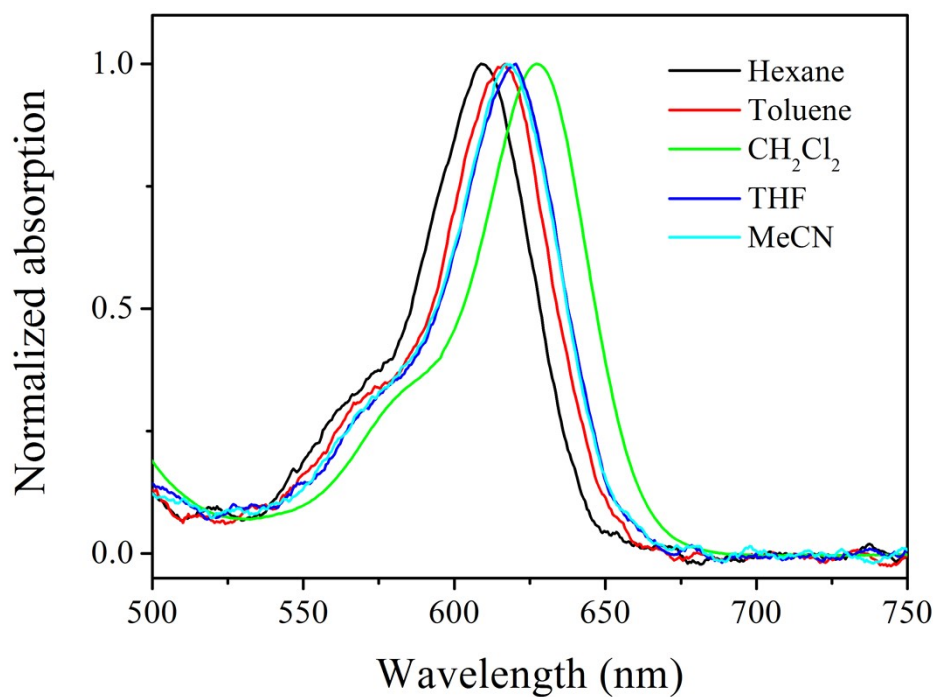

Figure S1-5. Absorption spectra of B5 upon various solvents.

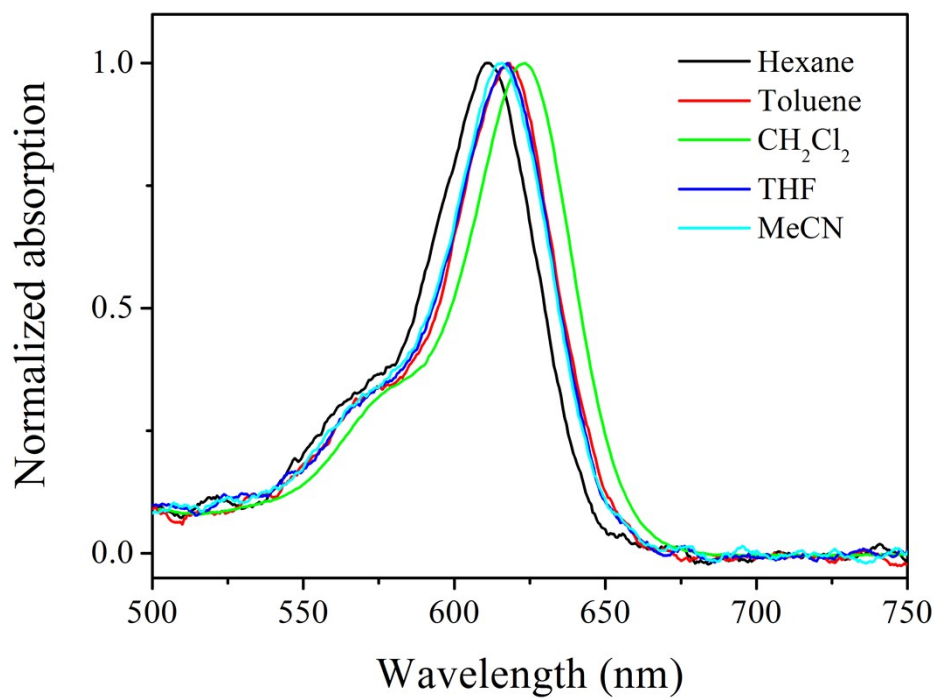

Figure S2-1. Emission spectra of B3 upon various solvents.

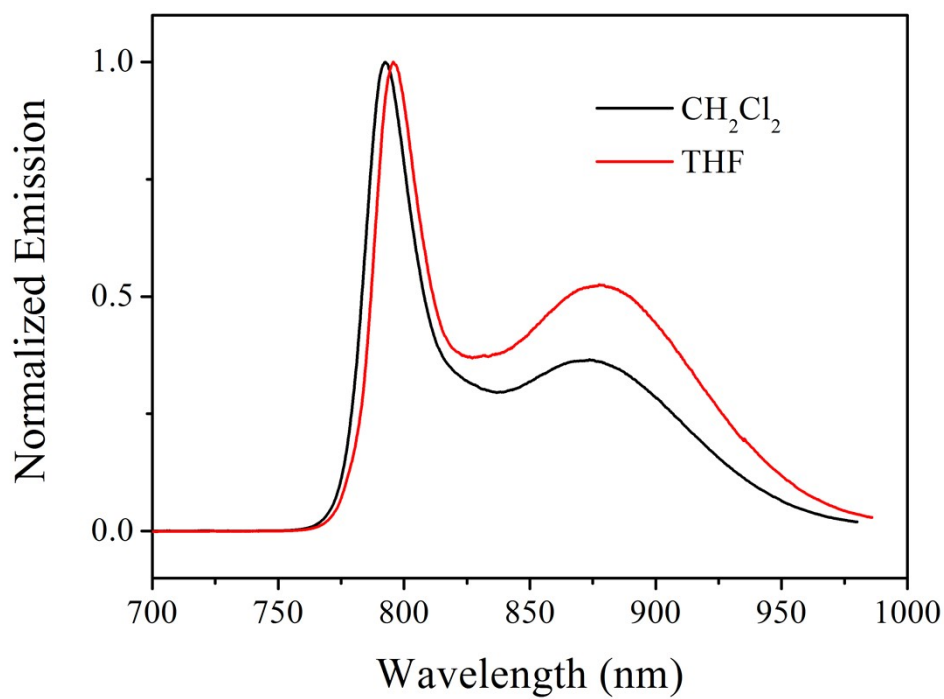

Figure S2-2. Emission spectra of B4 upon various solvents.

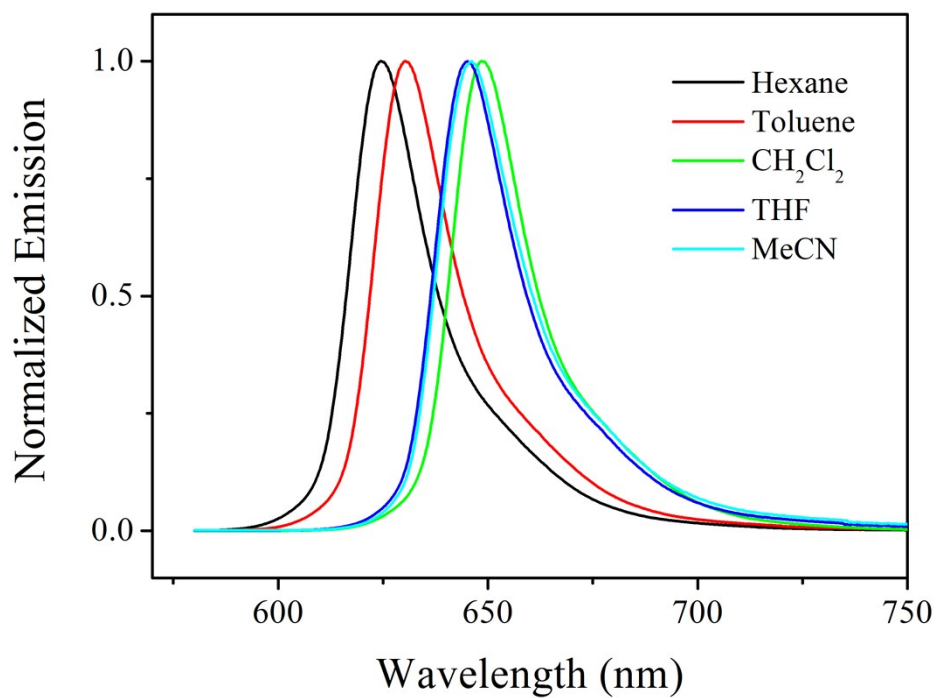

Figure S2-3. Emission spectra of B5 upon various solvents.

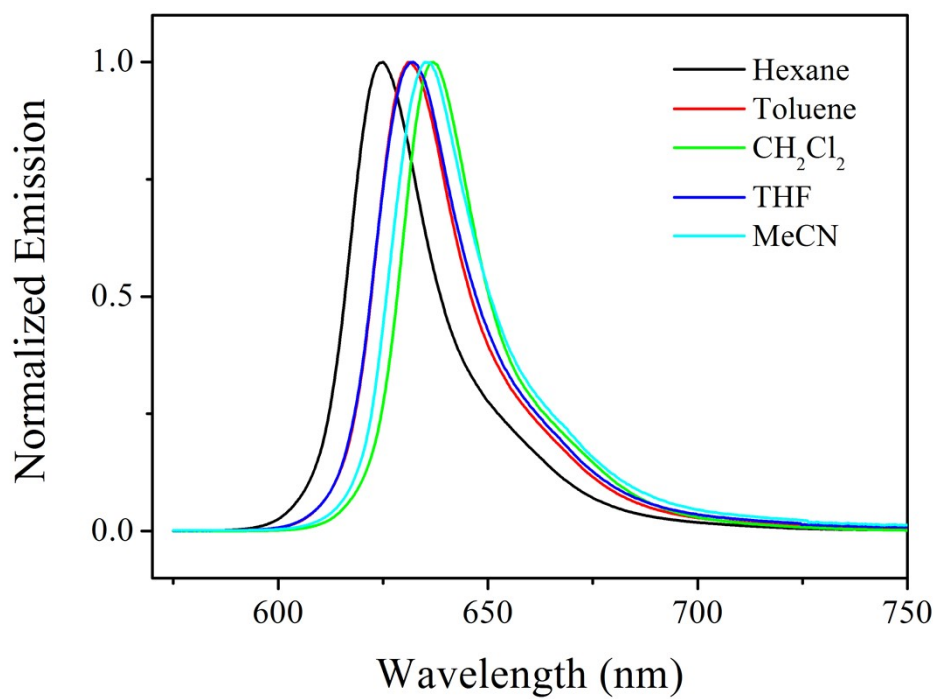

Table S2. OPA ( $S_0 \rightarrow S_n$ ) and TPA ( $TPA_{m,n}$ ) values of B1, B2, B4, and B5 calculated by TD-DFT at B3LYP/6-31G(d) level in vacuum. m and n denote state. See Supporting Information for a detailed result.

| Transitio<br>n        | B1              |                        | B2              |                        | B4              |                        | B5              |                        |
|-----------------------|-----------------|------------------------|-----------------|------------------------|-----------------|------------------------|-----------------|------------------------|
|                       | energ<br>y (eV) | oscillator<br>strength |
| $S_0 \rightarrow S_1$ | 2.701           | 0.5304                 | 1.880           | 0.3171                 | 2.413           | 0.7787                 | 2.420           | 0.3566                 |
| $S_0 \rightarrow S_2$ | 2.813           | 0.0074                 | 2.175           | 0.0240                 | 2.800           | 0.0966                 | 2.453           | 0.4878                 |
| $S_0 \rightarrow S_3$ | 2.941           | 0.0453                 | 2.217           | 0.6791                 | 2.836           | 0.0271                 | 2.753           | 0.0713                 |
| $S_0 \rightarrow S_4$ | 3.224           | 0.0118                 | 2.801           | 0.0153                 | 3.023           | 0.0091                 | 2.885           | 0.0725                 |
| $S_0 \rightarrow S_5$ | 3.249           | 0.0031                 | 3.064           | 0.0080                 | 3.181           | 0.0361                 | 3.117           | 0.0076                 |
| $TPA_{1,2}$           | 0.112           | 0.0115                 | 0.295           | 0.2182                 | 0.387           | 0.0272                 | 0.033           | 0.0130                 |
| $TPA_{1,3}$           | 0.241           | 0.0181                 | 0.336           | 0.0011                 | 0.423           | 0.0847                 | 0.333           | 0.0174                 |
| $TPA_{1,4}$           | 0.523           | 0.0098                 | 0.920           | 0.4828                 | 0.610           | 0.2121                 | 0.465           | 0.0347                 |
| $TPA_{1,5}$           | 0.549           | 0.0095                 | 1.184           | 0.0203                 | 0.768           | 0.0453                 | 0.697           | 0.0987                 |
| $TPA_{2,3}$           | 0.129           | 0.0867                 | 0.042           | 0.0120                 | 0.036           | 0.0270                 | 0.300           | 0.0059                 |
| $TPA_{2,4}$           | 0.411           | 0.0017                 | 0.626           | 0.0071                 | 0.223           | 0.0296                 | 0.432           | 0.0585                 |
| $TPA_{2,5}$           | 0.437           | 0.0014                 | 0.889           | 0.0201                 | 0.380           | 0.0171                 | 0.664           | 0.1017                 |
| $TPA_{3,4}$           | 0.282           | 0.0011                 | 0.584           | 0.3449                 | 0.187           | 0.0032                 | 0.132           | 0.1169                 |
| $TPA_{3,5}$           | 0.308           | 0.0005                 | 0.848           | 0.0010                 | 0.344           | 0.0123                 | 0.364           | 0.0408                 |
| $TPA_{4,5}$           | 0.026           | 0.0073                 | 0.264           | 0.0116                 | 0.158           | 0.1782                 | 0.233           | 0.0058                 |



### Emission decay fitting of B3.

B3 needed more explanation words to explain its decay behavior as follows. We tried three exponential decay equations to fit the decay data of B3 (first order, second order, and third order). As shown in Figure S1, the first order fitting (corresponding to mono-exponential) within 26-200 ns showed a bad  $R^2$  value of 0.8843. The second order fitting (corresponding to bi-exponential) within 26-200 ns showed an  $R^2$  value of 0.98357. The third order fitting (corresponding to tri-exponential) within 26-200 ns showed an  $R^2$  value of 0.98778. The  $\tau_1$  (2.87988 ns) and  $\tau_2$  (2.87897 ns) values for the third order fitting were rather similar to each other. So, the tri-exponential decay was degraded as bi-exponential decay. Thus, the second order fitting should be good enough to fit B3 decay data. On the other hand, the calculated weighted mean lifetime of B3  $[(A_1\tau_1^2 + A_2\tau_2^2)/(A_1\tau_1 + A_2\tau_2)]$  was only 3.2 ns. This short lifetime compared to those of B4 (36.4 ns) and B5 (34.9 ns) was clearly inconsistent with their comparable decay curves, especially within decay region of 30-200 ns. We found sharp intensity decrease for B3 within decay region of 26-30 ns, but after 30 ns, B3 tended to follow a mono-exponential decay, and this statement was supported by the first order fitting of B3 within 30-200 ns (starting from 30 ns, not 26 ns). An  $R^2$  value of 0.987 was observed. Thus, we stated in the manuscript that this sharp intensity decrease was caused by either geometric relaxation in excited state or energy transfer to the secondary emissive centre peaking at 876 nm. And the geometric relaxation in excited state is assumed as the major factor considering the low emission quantum yield of B3 (0.02).

Figure S3-1. Decay data of B3 and its mono-exponential decay within 26-200 ns.

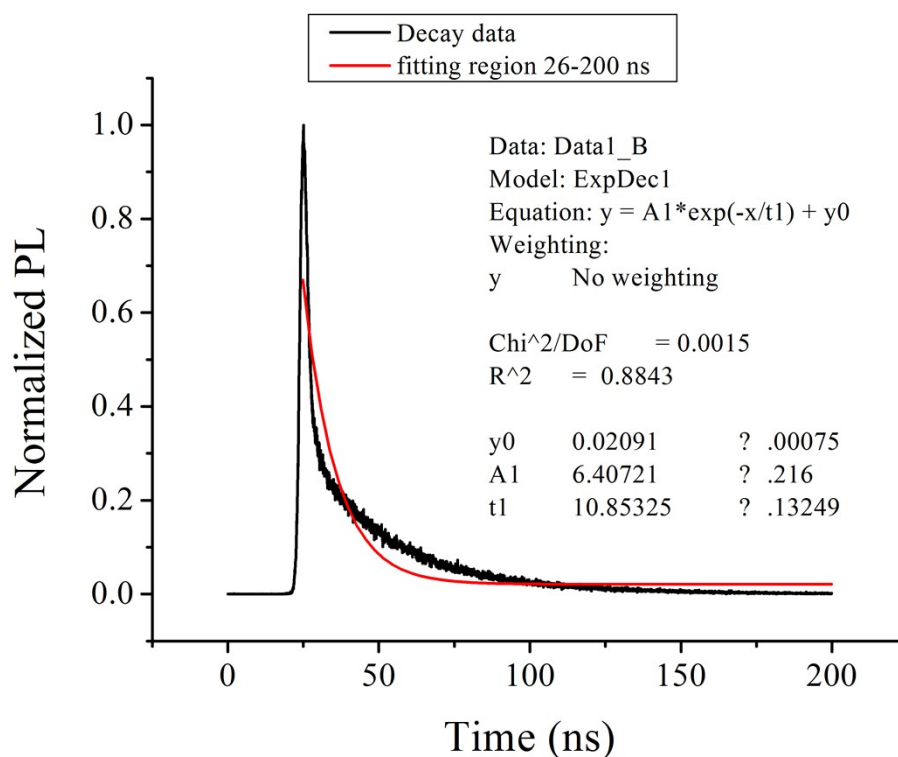

Figure S3-2. Decay data of B3 and its bi-exponential decay within 26-200 ns. The weighted mean lifetime was calculated by  $[(A_1\tau_1^2 + A_2\tau_2^2)/(A_1\tau_1 + A_2\tau_2)] = 3.2$  ns

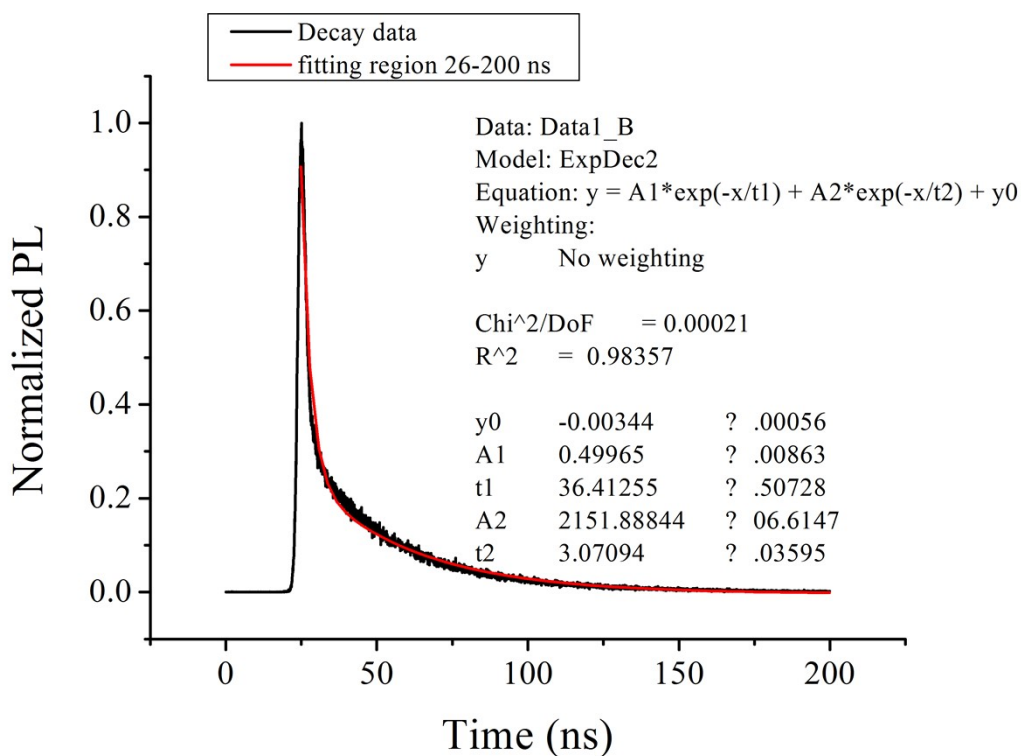

Figure S3-3. Decay data of B3 and its tri-exponential decay within 26-200 ns.  $\tau_1$  (2.87988)  $\approx$   $\tau_2$  (2.87897). So, the tri-exponential decay is degraded as bi-exponential decay.

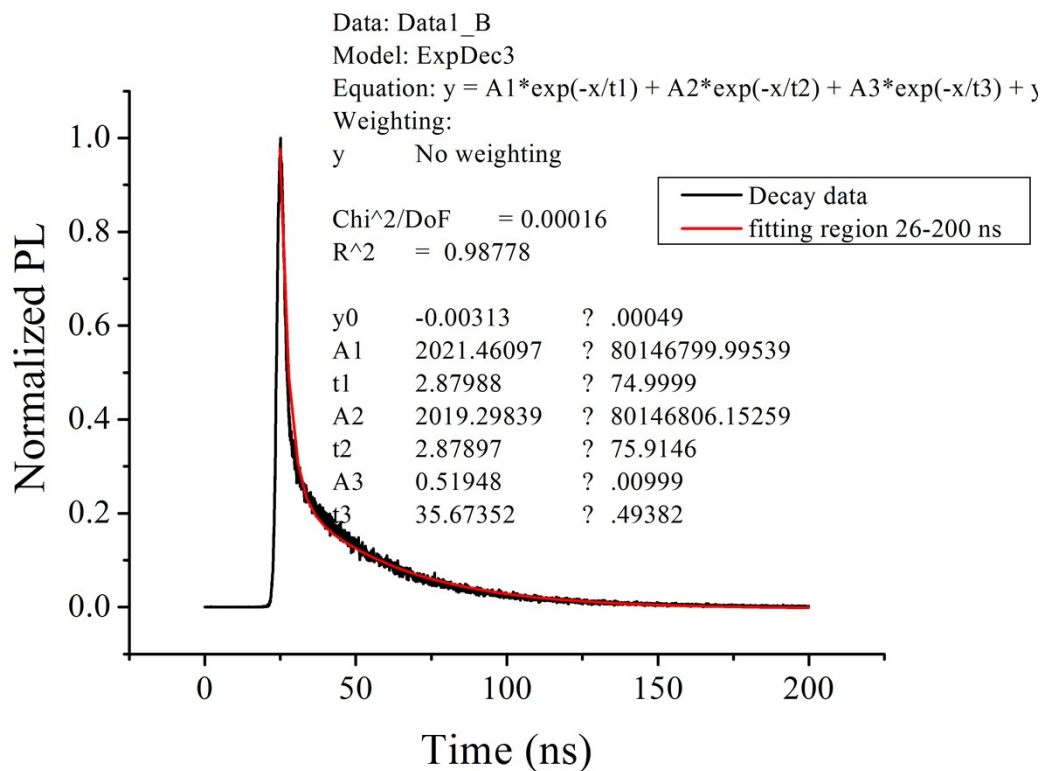

Figure S3-4. Decay data of B3 and its mono-exponential decay within 30-200 ns (starting from 30 ns, not 26 ns).

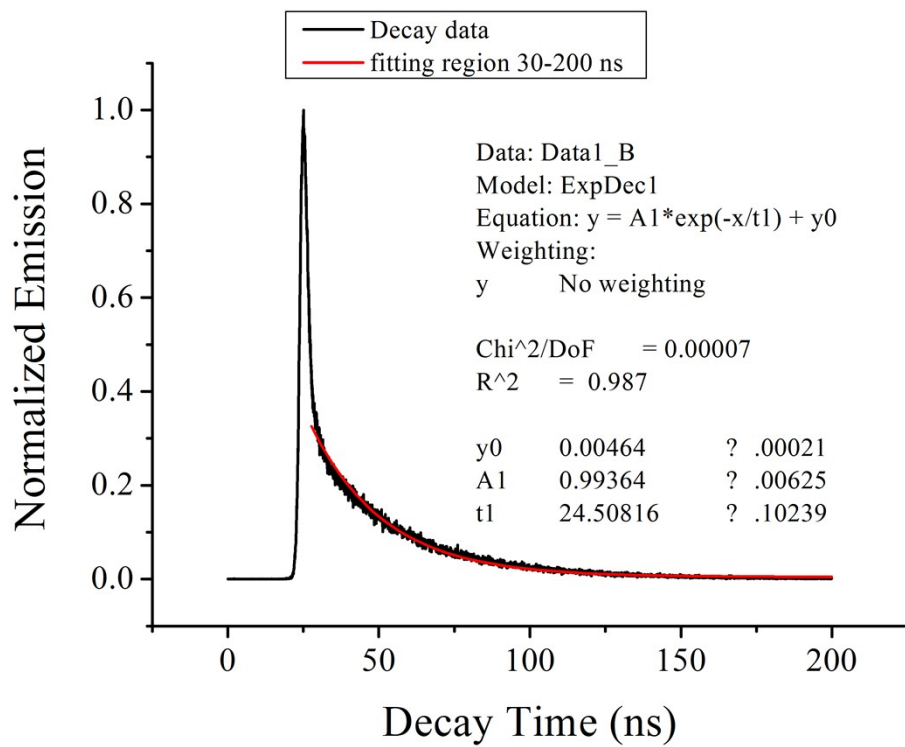

Figure S4. Decay data of B4 and its mono-exponential decay within 26-200 ns.

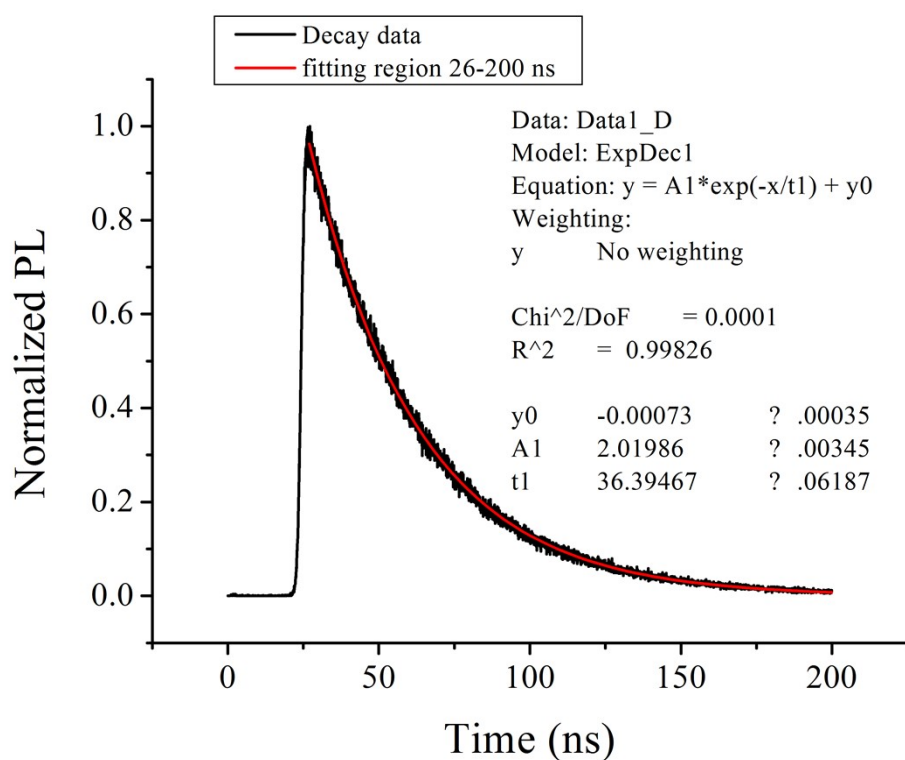

Figure S5. Decay data of B5 and its mono-exponential decay within 26-200 ns.

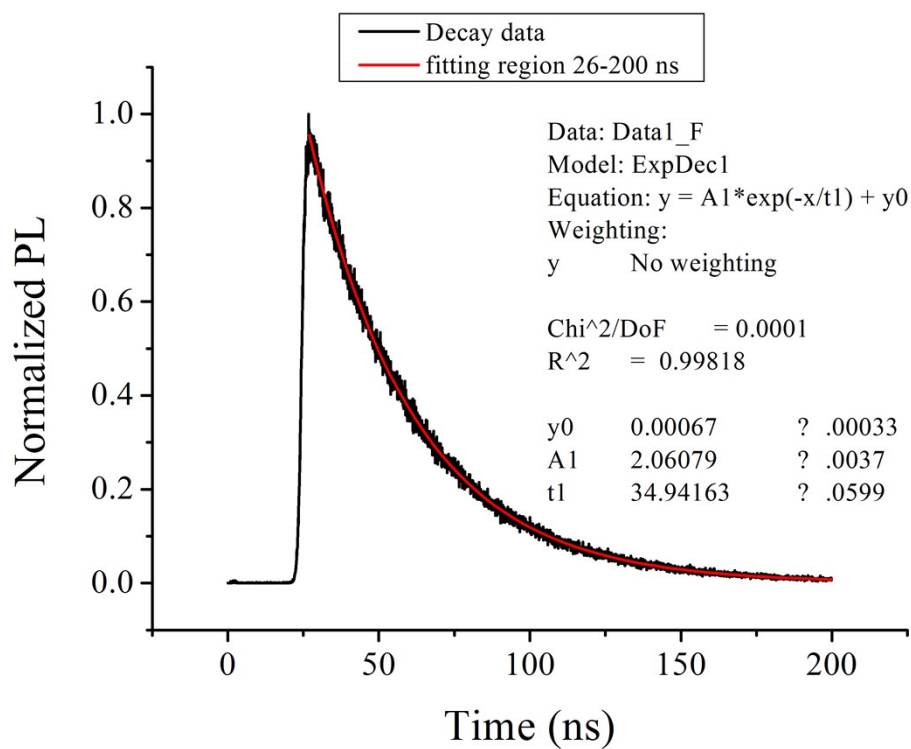

$^1\text{H}$ NMR of B1

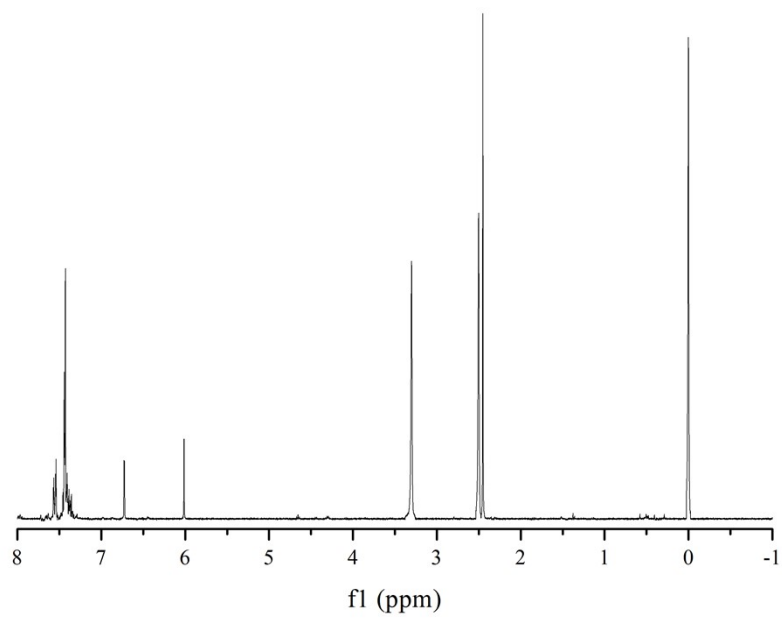

$^1\text{H}$ NMR of B2

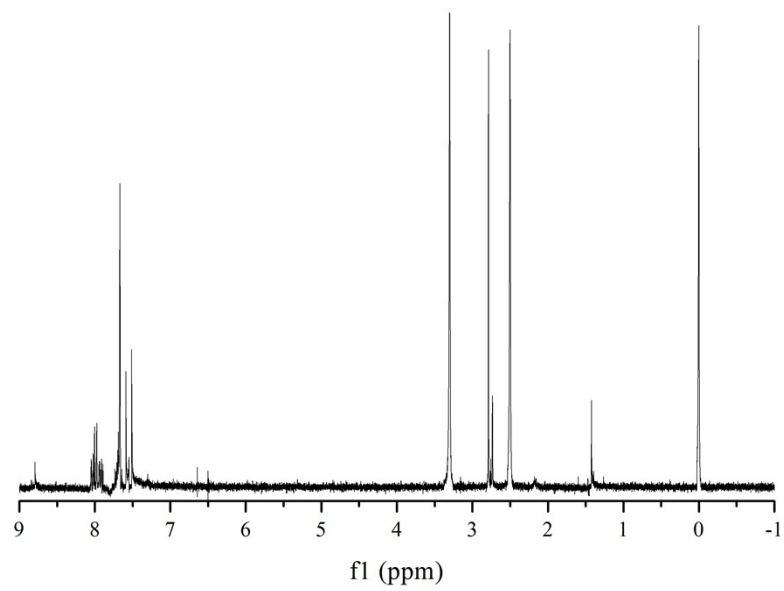

$^1\text{H}$ NMR of B3

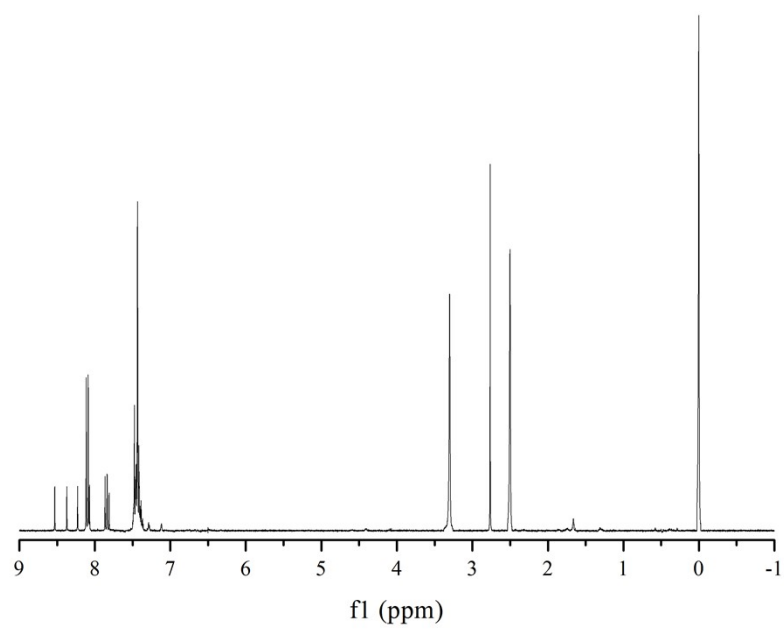

$^1\text{H}$ NMR of B4

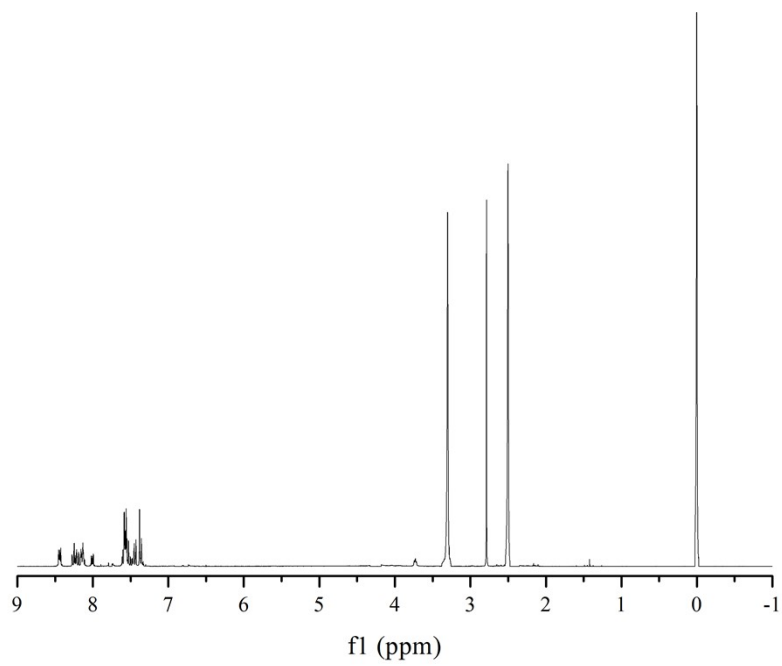



$^1\text{H}$ NMR of B5

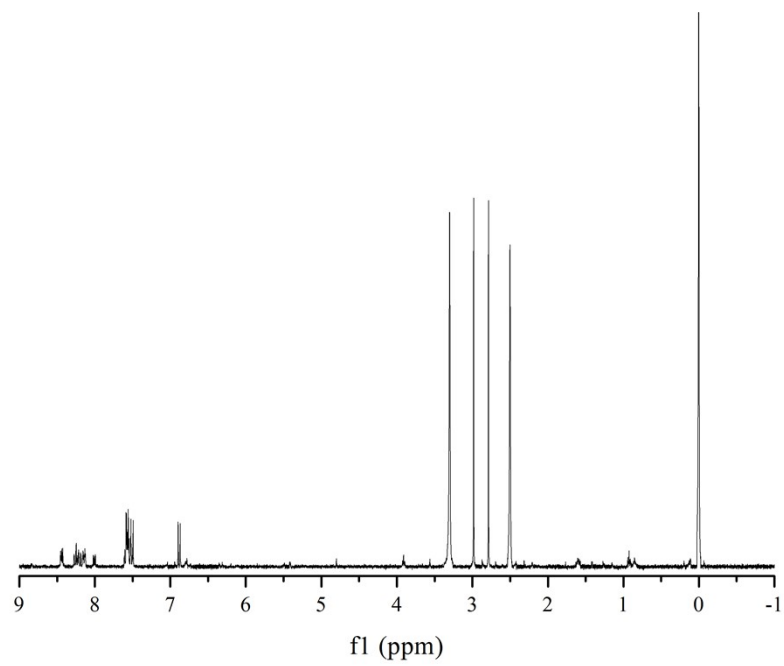

One photon absorption (OPA) and two photon absorption (OPA) TD-DFT calculation result of B1, B2, B4, and B5 calculated at RB3LYP/6-31G(d) level.

Result of B1

SINGLET EXCITATIONS

-----

STATE # 1 ENERGY = 2.700529 EV  
 OSCILLATOR STRENGTH = 0.530411  
 LAMBDA DIAGNOSTIC = 0.721 (RYDBERG/CHARGE TRANSFER CHARACTER)  
 SYMMETRY OF STATE = A

|     |     | EXCITATION |  | DE-EXCITATION |  |
|-----|-----|------------|--|---------------|--|
| OCC | VIR | AMPLITUDE  |  | AMPLITUDE     |  |
| I   | A   | X(I->A)    |  | Y(A->I)       |  |
| --- | --- | -----      |  | -----         |  |
| 107 | 114 | -0.034497  |  | -0.006454     |  |
| 108 | 114 | 0.146488   |  | 0.016780      |  |
| 110 | 114 | 0.067616   |  | 0.008450      |  |
| 112 | 114 | -0.227489  |  | -0.005894     |  |
| 113 | 114 | 0.968840   |  | -0.183809     |  |
| 111 | 115 | 0.031960   |  | 0.008054      |  |
| 108 | 120 | -0.033964  |  | -0.017962     |  |
| 112 | 120 | -0.039827  |  | -0.013981     |  |

STATE # 2 ENERGY = 2.812749 EV  
 OSCILLATOR STRENGTH = 0.007427  
 LAMBDA DIAGNOSTIC = 0.471 (RYDBERG/CHARGE TRANSFER CHARACTER)  
 SYMMETRY OF STATE = A

|     |     | EXCITATION |  | DE-EXCITATION |  |
|-----|-----|------------|--|---------------|--|
| OCC | VIR | AMPLITUDE  |  | AMPLITUDE     |  |
| I   | A   | X(I->A)    |  | Y(A->I)       |  |
| --- | --- | -----      |  | -----         |  |
| 108 | 114 | 0.104815   |  | -0.013550     |  |
| 111 | 114 | 0.101549   |  | 0.000034      |  |
| 112 | 114 | 0.963197   |  | -0.023863     |  |
| 113 | 114 | 0.214974   |  | -0.048232     |  |

STATE # 3 ENERGY = 2.941398 EV  
 OSCILLATOR STRENGTH = 0.045295  
 LAMBDA DIAGNOSTIC = 0.422 (RYDBERG/CHARGE TRANSFER CHARACTER)  
 SYMMETRY OF STATE = A

EXCITATION DE-EXCITATION

| OCC | VIR | AMPLITUDE | AMPLITUDE |
|-----|-----|-----------|-----------|
| I   | A   | X(I->A)   | Y(A->I)   |
| --- | --- | -----     | -----     |
| 111 | 114 | 0.991629  | -0.017013 |
| 112 | 114 | -0.104812 | 0.004808  |

STATE # 4 ENERGY = 3.223681 EV  
 OSCILLATOR STRENGTH = 0.011829  
 LAMBDA DIAGNOSTIC = 0.184 (RYDBERG/CHARGE TRANSFER CHARACTER)  
 SYMMETRY OF STATE = A

|     |     | EXCITATION | DE-EXCITATION |
|-----|-----|------------|---------------|
| OCC | VIR | AMPLITUDE  | AMPLITUDE     |
| I   | A   | X(I->A)    | Y(A->I)       |
| --- | --- | -----      | -----         |
| 110 | 114 | -0.996076  | 0.002597      |
| 113 | 114 | 0.068702   | -0.021804     |

STATE # 5 ENERGY = 3.249410 EV  
 OSCILLATOR STRENGTH = 0.003084  
 LAMBDA DIAGNOSTIC = 0.177 (RYDBERG/CHARGE TRANSFER CHARACTER)  
 SYMMETRY OF STATE = A

|     |     | EXCITATION | DE-EXCITATION |
|-----|-----|------------|---------------|
| OCC | VIR | AMPLITUDE  | AMPLITUDE     |
| I   | A   | X(I->A)    | Y(A->I)       |
| --- | --- | -----      | -----         |
| 109 | 114 | -0.998021  | 0.002341      |

#### SUMMARY OF TDDFT RESULTS

| STATE | ENERGY           | EXCITATION | TRANSITION DIPOLE, A.U. |         |         | OSCILLATOR |
|-------|------------------|------------|-------------------------|---------|---------|------------|
| 0 ->  | HARTREE          | EV         | X                       | Y       | Z       | STRENGTH   |
| 0 A   | -1558.2931267666 | 0.000      |                         |         |         |            |
| 1 A   | -1558.1938841329 | 2.701      | -2.6379                 | -0.9475 | -0.4004 | 0.5304     |
| 2 A   | -1558.1897601348 | 2.813      | -0.3119                 | 0.1016  | 0.0142  | 0.0074     |
| 3 A   | -1558.1850323609 | 2.941      | 0.2630                  | -0.7441 | -0.0752 | 0.0453     |
| 4 A   | -1558.1746586681 | 3.224      | -0.3841                 | -0.0417 | -0.0222 | 0.0118     |
| 5 A   | -1558.1737131339 | 3.249      | 0.0892                  | 0.1476  | 0.0948  | 0.0031     |

  

| TRANSITION | EXCITATION | TRANSITION DIPOLE, A.U. |         |         | OSCILLATOR |          |
|------------|------------|-------------------------|---------|---------|------------|----------|
|            | EV         | X                       | Y       | Z       | DIP        | STRENGTH |
| 1 -> 2     | 0.112      | 0.1484                  | -2.0156 | -0.2999 | 2.0432     | 0.0115   |
| 1 -> 3     | 0.241      | 1.6818                  | 0.3788  | 0.2994  | 1.7497     | 0.0181   |
| 1 -> 4     | 0.523      | 0.6768                  | -0.5482 | 0.0716  | 0.8739     | 0.0098   |

|        |       |         |         |         |        |        |
|--------|-------|---------|---------|---------|--------|--------|
| 1 -> 5 | 0.549 | 0.6340  | 0.5443  | 0.0978  | 0.8413 | 0.0095 |
| 2 -> 3 | 0.129 | -4.9710 | -1.4681 | -0.8029 | 5.2451 | 0.0867 |
| 2 -> 4 | 0.411 | 0.3857  | -0.0897 | -0.1061 | 0.4099 | 0.0017 |
| 2 -> 5 | 0.437 | 0.2443  | 0.2117  | 0.1687  | 0.3646 | 0.0014 |
| 3 -> 4 | 0.282 | -0.3778 | 0.0415  | -0.1363 | 0.4037 | 0.0011 |
| 3 -> 5 | 0.308 | 0.1162  | 0.2154  | -0.0758 | 0.2562 | 0.0005 |
| 4 -> 5 | 0.026 | -3.1949 | -0.9996 | -0.5701 | 3.3959 | 0.0073 |

SELECTING EXCITED STATE 1 E= -1558.1938841329 AS THE STATE OF INTEREST.

..... DONE WITH TD-DFT EXCITATION ENERGIES .....

STEP CPU TIME = 4891.00 TOTAL CPU TIME = 6601.1 ( 110.0 MIN)

TOTAL WALL CLOCK TIME= 6840.0 SECONDS, CPU UTILIZATION IS 96.51%

TWO-PHOTON ABSORPTION (TPA) CALCULATIONS (A.U.):

EXCITED STATE # 1

SUBCOMPONENT 1 HAS CONVERGED: 17 9.7276E-05

SUBCOMPONENT 2 HAS CONVERGED: 19 5.5282E-05

SUBCOMPONENT 3 HAS CONVERGED: 17 2.2674E-04

TPA TRANSITION (SYMMETRIC) TENSOR ELEMENTS (A.U.):

S(1,1) = 3.1131

S(2,1) = -10.1103

S(2,2) = -15.2544

S(3,1) = -4.0790

S(3,2) = -5.5146

S(3,3) = -1.7570

DF = (SUM\_{I,J} S(I,I)\*S(J,J))/30 = 6.4387 (A.U.)

DG = (SUM\_{I,J} S(I,J)\*S(I,J))/30 = 18.1336 (A.U.)

$$D \text{ (LINEAR POLARIZATION)} = 2*DF+4*DG = 85.4118 \text{ (A.U.)}$$

$$D \text{ (CIRCULAR POLARIZATION)} = -2*DF+6*DG = 95.9241 \text{ (A.U.)}$$

$$R \text{ (POLARIZATION RATIO)} = (-DF+3*DG)/(DF+2*DG) = 1.1231$$

EXCITED STATE # 2

SUBCOMPONENT 1 HAS CONVERGED: 17 9.1415E-05

SUBCOMPONENT 2 HAS CONVERGED: 19 1.4188E-05

SUBCOMPONENT 3 HAS CONVERGED: 21 1.1052E-05

TPA TRANSITION (SYMMETRIC) TENSOR ELEMENTS (A.U.):

$$S(1,1) = -32.8940$$

$$S(2,1) = 68.8766$$

$$S(2,2) = 66.4205$$

$$S(3,1) = 6.4941$$

$$S(3,2) = 19.4435$$

$$S(3,3) = 3.9191$$

$$DF = (\text{SUM}_{\{I,J\}} S(I,I)*S(J,J))/30 = 46.7393 \text{ (A.U.)}$$

$$DG = (\text{SUM}_{\{I,J\}} S(I,J)*S(I,J))/30 = 527.9165 \text{ (A.U.)}$$

$$D \text{ (LINEAR POLARIZATION)} = 2*DF+4*DG = 2205.1447 \text{ (A.U.)}$$

$$D \text{ (CIRCULAR POLARIZATION)} = -2*DF+6*DG = 3074.0205 \text{ (A.U.)}$$

$$R \text{ (POLARIZATION RATIO)} = (-DF+3*DG)/(DF+2*DG) = 1.3940$$

EXCITED STATE # 3

SUBCOMPONENT 1 HAS CONVERGED: 17 9.1971E-05  
SUBCOMPONENT 2 HAS CONVERGED: 19 1.4630E-05  
SUBCOMPONENT 3 HAS CONVERGED: 21 5.1747E-05

TPA TRANSITION (SYMMETRIC) TENSOR ELEMENTS (A.U.):

S(1,1) = -87.0244  
S(2,1) = 0.5663  
S(2,2) = -67.2787  
S(3,1) = -11.6376  
S(3,2) = -12.3391  
S(3,3) = -2.9558

DF = (SUM\_{I,J} S(I,I)\*S(J,J))/30 = 824.3450 (A.U.)  
DG = (SUM\_{I,J} S(I,J)\*S(I,J))/30 = 422.8139 (A.U.)

D (LINEAR POLARIZATION) = 2\*DF+4\*DG = 3339.9454 (A.U.)  
D (CIRCULAR POLARIZATION) = -2\*DF+6\*DG = 888.1933 (A.U.)

R (POLARIZATION RATIO) = (-DF+3\*DG)/(DF+2\*DG) = 0.2659

EXCITED STATE # 4

SUBCOMPONENT 1 HAS CONVERGED: 17 1.0686E-04  
SUBCOMPONENT 2 HAS CONVERGED: 17 2.2832E-04  
SUBCOMPONENT 3 HAS CONVERGED: 19 2.9921E-05

TPA TRANSITION (SYMMETRIC) TENSOR ELEMENTS (A.U.):

S(1,1) = -10.0708  
S(2,1) = 2.0776  
S(2,2) = 8.9211  
S(3,1) = -6.3617

$$S(3,2) = 1.5432$$

$$S(3,3) = -1.2697$$

$$DF = (\text{SUM}_{\{I,J\}} S(I,I)*S(J,J))/30 = 0.1951 \text{ (A.U.)}$$

$$DG = (\text{SUM}_{\{I,J\}} S(I,J)*S(I,J))/30 = 9.2319 \text{ (A.U.)}$$

$$D \text{ (LINEAR POLARIZATION)} = 2*DF+4*DG = 37.3179 \text{ (A.U.)}$$

$$D \text{ (CIRCULAR POLARIZATION)} = -2*DF+6*DG = 55.0013 \text{ (A.U.)}$$

$$R \text{ (POLARIZATION RATIO)} = (-DF+3*DG)/(DF+2*DG) = 1.4739$$

EXCITED STATE # 5

SUBCOMPONENT 1 HAS CONVERGED: 17 1.0919E-04  
 SUBCOMPONENT 2 HAS CONVERGED: 17 2.2010E-04  
 SUBCOMPONENT 3 HAS CONVERGED: 19 2.5584E-05

TPA TRANSITION (SYMMETRIC) TENSOR ELEMENTS (A.U.):

$$S(1,1) = -12.5773$$

$$S(2,1) = -11.3478$$

$$S(2,2) = 3.2977$$

$$S(3,1) = -0.9206$$

$$S(3,2) = 5.6457$$

$$S(3,3) = 2.2678$$

$$DF = (\text{SUM}_{\{I,J\}} S(I,I)*S(J,J))/30 = 1.6388 \text{ (A.U.)}$$

$$DG = (\text{SUM}_{\{I,J\}} S(I,J)*S(I,J))/30 = 16.5732 \text{ (A.U.)}$$

$$D \text{ (LINEAR POLARIZATION)} = 2*DF+4*DG = 69.5703 \text{ (A.U.)}$$

$$D \text{ (CIRCULAR POLARIZATION)} = -2*DF+6*DG = 96.1613 \text{ (A.U.)}$$

$$R (\text{POLARIZATION RATIO}) = (-DF+3*DG)/(DF+2*DG) = 1.3822$$

..... DONE WITH TD-DFT TPA-CROSS SECTIONS .....

Result of B2

SINGLET EXCITATIONS

-----

STATE # 1 ENERGY = 1.880200 EV  
 OSCILLATOR STRENGTH = 0.317060  
 LAMBDA DIAGNOSTIC = 0.706 (RYDBERG/CHARGE TRANSFER CHARACTER)  
 SYMMETRY OF STATE = A

| OCC | VIR | EXCITATION | DE-EXCITATION |
|-----|-----|------------|---------------|
|     |     | AMPLITUDE  | AMPLITUDE     |
| I   | A   | X(I->A)    | Y(A->I)       |
| --- | --- | -----      | -----         |
| 129 | 138 | 0.033557   | -0.004863     |
| 131 | 138 | 0.050387   | 0.021422      |
| 133 | 138 | 0.050147   | 0.014976      |
| 136 | 138 | 0.544473   | -0.001967     |
| 137 | 138 | 0.839367   | -0.127302     |
| 132 | 139 | -0.030946  | -0.009392     |
| 135 | 139 | -0.034453  | 0.007043      |
| 136 | 140 | 0.039242   | 0.010541      |

STATE # 2 ENERGY = 2.174943 EV  
 OSCILLATOR STRENGTH = 0.024034  
 LAMBDA DIAGNOSTIC = 0.666 (RYDBERG/CHARGE TRANSFER CHARACTER)  
 SYMMETRY OF STATE = A

| OCC | VIR | EXCITATION | DE-EXCITATION |
|-----|-----|------------|---------------|
|     |     | AMPLITUDE  | AMPLITUDE     |
| I   | A   | X(I->A)    | Y(A->I)       |
| --- | --- | -----      | -----         |
| 130 | 138 | 0.044629   | 0.002111      |
| 132 | 138 | -0.057377  | -0.011566     |
| 134 | 138 | -0.058331  | 0.001496      |
| 135 | 138 | -0.986359  | 0.043443      |
| 136 | 138 | -0.085790  | 0.005002      |
| 137 | 138 | 0.034065   | -0.007468     |



|     |     |          |          |
|-----|-----|----------|----------|
| 133 | 139 | 0.043993 | 0.009487 |
| 137 | 139 | 0.054194 | 0.000871 |
| 132 | 140 | 0.037946 | 0.008723 |
| 137 | 143 | 0.031486 | 0.015118 |

STATE # 3 ENERGY = 2.216666 EV  
 OSCILLATOR STRENGTH = 0.679085  
 LAMBDA DIAGNOSTIC = 0.673 (RYDBERG/CHARGE TRANSFER CHARACTER)  
 SYMMETRY OF STATE = A

|     |     | EXCITATION | DE-EXCITATION |
|-----|-----|------------|---------------|
| OCC | VIR | AMPLITUDE  | AMPLITUDE     |
| I   | A   | X(I->A)    | Y(A->I)       |
| --- | --- | -----      | -----         |
| 131 | 138 | -0.080400  | -0.028373     |
| 135 | 138 | -0.090066  | 0.005057      |
| 136 | 138 | 0.830110   | -0.061149     |
| 137 | 138 | -0.554284  | 0.122622      |
| 132 | 139 | -0.030928  | -0.008014     |
| 134 | 139 | -0.042695  | -0.004480     |
| 136 | 144 | 0.032090   | 0.012771      |

STATE # 4 ENERGY = 2.800600 EV  
 OSCILLATOR STRENGTH = 0.015278  
 LAMBDA DIAGNOSTIC = 0.640 (RYDBERG/CHARGE TRANSFER CHARACTER)  
 SYMMETRY OF STATE = A

|     |     | EXCITATION | DE-EXCITATION |
|-----|-----|------------|---------------|
| OCC | VIR | AMPLITUDE  | AMPLITUDE     |
| I   | A   | X(I->A)    | Y(A->I)       |
| --- | --- | -----      | -----         |
| 132 | 138 | 0.031343   | -0.000034     |
| 134 | 138 | -0.955767  | 0.030776      |
| 135 | 138 | 0.068770   | -0.002542     |
| 137 | 139 | 0.266763   | 0.030000      |
| 134 | 140 | -0.037883  | -0.006647     |
| 135 | 144 | -0.037537  | -0.013986     |

STATE # 5 ENERGY = 3.064317 EV  
 OSCILLATOR STRENGTH = 0.007988  
 LAMBDA DIAGNOSTIC = 0.498 (RYDBERG/CHARGE TRANSFER CHARACTER)  
 SYMMETRY OF STATE = A

|     |     | EXCITATION | DE-EXCITATION |
|-----|-----|------------|---------------|
| OCC | VIR | AMPLITUDE  | AMPLITUDE     |
| I   | A   | X(I->A)    | Y(A->I)       |
| --- | --- | -----      | -----         |

|     |     |           |           |
|-----|-----|-----------|-----------|
| 129 | 138 | 0.037267  | 0.000241  |
| 131 | 138 | 0.221176  | -0.001571 |
| 132 | 138 | 0.043130  | -0.000890 |
| 133 | 138 | -0.957566 | 0.016703  |
| 136 | 138 | 0.031732  | -0.011380 |
| 135 | 139 | 0.096068  | -0.001395 |
| 133 | 140 | -0.030498 | -0.011085 |
| 136 | 140 | 0.074777  | -0.002265 |
| 137 | 140 | 0.033632  | -0.004804 |
| 134 | 141 | 0.053001  | 0.016823  |
| 131 | 142 | -0.032131 | -0.011783 |
| 136 | 142 | 0.030875  | 0.006332  |
| 137 | 142 | -0.067677 | -0.012920 |

#### SUMMARY OF TDDFT RESULTS

| STATE | ENERGY           | EXCITATION | TRANSITION DIPOLE, A.U. |         |         | OSCILLATOR |
|-------|------------------|------------|-------------------------|---------|---------|------------|
|       |                  |            | X                       | Y       | Z       |            |
| 0 ->  | HARTREE          | EV         |                         |         |         | STRENGTH   |
| 0 A   | -1862.9938604209 | 0.000      |                         |         |         |            |
| 1 A   | -1862.9247643427 | 1.880      | -0.0470                 | -0.5284 | -2.5694 | 0.3171     |
| 2 A   | -1862.9139327500 | 2.175      | 0.0742                  | -0.6638 | -0.0705 | 0.0240     |
| 3 A   | -1862.9123994559 | 2.217      | 0.0793                  | 0.6865  | 3.4680  | 0.6791     |
| 4 A   | -1862.8909402490 | 2.801      | -0.0663                 | -0.4481 | 0.1321  | 0.0153     |
| 5 A   | -1862.8812488530 | 3.064      | -0.0088                 | 0.0040  | -0.3261 | 0.0080     |

  

| TRANSITION | EXCITATION | TRANSITION DIPOLE, A.U. |         |         | OSCILLATOR |        |
|------------|------------|-------------------------|---------|---------|------------|--------|
|            |            | X                       | Y       | Z       |            |        |
|            | EV         |                         |         |         | DIP        |        |
| 1 -> 2     | 0.295      | 0.0928                  | 1.1306  | 5.3789  | 5.4972     | 0.2182 |
| 1 -> 3     | 0.336      | 0.0418                  | -0.1400 | 0.3329  | 0.3636     | 0.0011 |
| 1 -> 4     | 0.920      | -0.0956                 | -0.9529 | -4.5268 | 4.6270     | 0.4828 |
| 1 -> 5     | 1.184      | -0.0532                 | 0.7916  | -0.2666 | 0.8369     | 0.0203 |
| 2 -> 3     | 0.042      | 0.0640                  | 0.7544  | 3.3385  | 3.4232     | 0.0120 |
| 2 -> 4     | 0.626      | 0.1185                  | -0.6544 | -0.1451 | 0.6806     | 0.0071 |
| 2 -> 5     | 0.889      | -0.0256                 | -0.2612 | -0.9232 | 0.9598     | 0.0201 |
| 3 -> 4     | 0.584      | 0.1198                  | 0.9810  | 4.8095  | 4.9100     | 0.3449 |
| 3 -> 5     | 0.848      | 0.0554                  | -0.1999 | 0.0856  | 0.2244     | 0.0010 |
| 4 -> 5     | 0.264      | 0.0278                  | 0.2714  | 1.3092  | 1.3373     | 0.0116 |

SELECTING EXCITED STATE 1 E= -1862.9247643427 AS THE STATE OF INTEREST.

..... DONE WITH TD-DFT EXCITATION ENERGIES .....

STEP CPU TIME = 9445.17 TOTAL CPU TIME = 12172.9 ( 202.9 MIN)

TOTAL WALL CLOCK TIME= 12188.2 SECONDS, CPU UTILIZATION IS 99.87%

TWO-PHOTON ABSORPTION (TPA) CALCULATIONS (A.U.):

EXCITED STATE # 1

SUBCOMPONENT 1 HAS CONVERGED: 19 5.4712E-06

SUBCOMPONENT 2 HAS CONVERGED: 17 1.0334E-04

SUBCOMPONENT 3 HAS CONVERGED: 19 9.5578E-05

TPA TRANSITION (SYMMETRIC) TENSOR ELEMENTS (A.U.):

$$S(1,1) = 0.5104$$

$$S(2,1) = 1.6790$$

$$S(2,2) = -21.4811$$

$$S(3,1) = 13.5525$$

$$S(3,2) = -49.1844$$

$$S(3,3) = 25.6299$$

$$DF = (\text{SUM}_{\{I,J\}} S(I,I)*S(J,J))/30 = 0.7236 \text{ (A.U.)}$$

$$DG = (\text{SUM}_{\{I,J\}} S(I,J)*S(I,J))/30 = 210.9928 \text{ (A.U.)}$$

$$D \text{ (LINEAR POLARIZATION)} = 2*DF+4*DG = 845.4184 \text{ (A.U.)}$$

$$D \text{ (CIRCULAR POLARIZATION)} = -2*DF+6*DG = 1264.5095 \text{ (A.U.)}$$

$$R \text{ (POLARIZATION RATIO)} = (-DF+3*DG)/(DF+2*DG) = 1.4957$$

EXCITED STATE # 2

SUBCOMPONENT 1 HAS CONVERGED: 19 6.0801E-06

SUBCOMPONENT 2 HAS CONVERGED: 19 9.2465E-05  
SUBCOMPONENT 3 HAS CONVERGED: 19 1.6564E-04

TPA TRANSITION (SYMMETRIC) TENSOR ELEMENTS (A.U.):

S(1,1) = -0.4552  
S(2,1) = 0.4342  
S(2,2) = 9.2525  
S(3,1) = -0.8225  
S(3,2) = -17.2556  
S(3,3) = -82.5668

DF = (SUM\_{I,J} S(I,I)\*S(J,J))/30 = 181.3976 (A.U.)  
DG = (SUM\_{I,J} S(I,J)\*S(I,J))/30 = 250.0112 (A.U.)

D (LINEAR POLARIZATION) = 2\*DF+4\*DG = 1362.8401 (A.U.)  
D (CIRCULAR POLARIZATION) = -2\*DF+6\*DG = 1137.2720 (A.U.)

R (POLARIZATION RATIO) = (-DF+3\*DG)/(DF+2\*DG) = 0.8345

EXCITED STATE # 3

SUBCOMPONENT 1 HAS CONVERGED: 19 6.2608E-06  
SUBCOMPONENT 2 HAS CONVERGED: 19 3.3158E-05  
SUBCOMPONENT 3 HAS CONVERGED: 19 1.8781E-04

TPA TRANSITION (SYMMETRIC) TENSOR ELEMENTS (A.U.):

S(1,1) = -0.0908  
S(2,1) = -1.6478  
S(2,2) = -21.7681  
S(3,1) = -1.5742  
S(3,2) = -52.2911

$$S(3,3) = 13.6099$$

$$DF = (\text{SUM}_{\{I,J\}} S(I,I)*S(J,J))/30 = 2.2682 \text{ (A.U.)}$$

$$DG = (\text{SUM}_{\{I,J\}} S(I,J)*S(I,J))/30 = 204.6068 \text{ (A.U.)}$$

$$D \text{ (LINEAR POLARIZATION)} = 2*DF+4*DG = 822.9635 \text{ (A.U.)}$$

$$D \text{ (CIRCULAR POLARIZATION)} = -2*DF+6*DG = 1223.1043 \text{ (A.U.)}$$

$$R \text{ (POLARIZATION RATIO)} = (-DF+3*DG)/(DF+2*DG) = 1.4862$$

#### EXCITED STATE # 4

SUBCOMPONENT 1 HAS CONVERGED: 19 1.8351E-05

SUBCOMPONENT 2 HAS CONVERGED: 19 1.5827E-04

SUBCOMPONENT 3 HAS CONVERGED: 21 2.9691E-04

#### TPA TRANSITION (SYMMETRIC) TENSOR ELEMENTS (A.U.):

$$S(1,1) = 0.5730$$

$$S(2,1) = 3.4675$$

$$S(2,2) = 58.6041$$

$$S(3,1) = 14.5973$$

$$S(3,2) = 129.4395$$

$$S(3,3) = 649.1651$$

$$DF = (\text{SUM}_{\{I,J\}} S(I,I)*S(J,J))/30 = 16724.9532 \text{ (A.U.)}$$

$$DG = (\text{SUM}_{\{I,J\}} S(I,J)*S(I,J))/30 = 15293.6486 \text{ (A.U.)}$$

$$D \text{ (LINEAR POLARIZATION)} = 2*DF+4*DG = 94624.5006 \text{ (A.U.)}$$

$$D \text{ (CIRCULAR POLARIZATION)} = -2*DF+6*DG = 58311.9851 \text{ (A.U.)}$$

$$R \text{ (POLARIZATION RATIO)} = (-DF+3*DG)/(DF+2*DG) = 0.6162$$

EXCITED STATE # 5

SUBCOMPONENT 1 HAS CONVERGED: 23 1.9648E-05  
SUBCOMPONENT 2 HAS CONVERGED: 21 3.6938E-04  
SUBCOMPONENT 3 HAS CONVERGED: 21 3.0768E-04

TPA TRANSITION (SYMMETRIC) TENSOR ELEMENTS (A.U.):

S(1,1) = 0.1966  
S(2,1) = -0.1803  
S(2,2) = -20.1823  
S(3,1) = 4.6323  
S(3,2) = -47.7394  
S(3,3) = 28.4354

DF = (SUM\_{I,J} S(I,I)\*S(J,J))/30 = 2.3800 (A.U.)  
DG = (SUM\_{I,J} S(I,J)\*S(I,J))/30 = 193.9004 (A.U.)

D (LINEAR POLARIZATION) = 2\*DF+4\*DG = 780.3616 (A.U.)  
D (CIRCULAR POLARIZATION) = -2\*DF+6\*DG = 1158.6427 (A.U.)

R (POLARIZATION RATIO) = (-DF+3\*DG)/(DF+2\*DG) = 1.4848

..... DONE WITH TD-DFT TPA-CROSS SECTIONS .....

Result of B4

SINGLET EXCITATIONS

-----

STATE # 1 ENERGY = 2.412915 EV  
 OSCILLATOR STRENGTH = 0.778720  
 LAMBDA DIAGNOSTIC = 0.698 (RYDBERG/CHARGE TRANSFER CHARACTER)  
 SYMMETRY OF STATE = A

| OCC | VIR | EXCITATION DE-EXCITATION |           |
|-----|-----|--------------------------|-----------|
|     |     | AMPLITUDE                | AMPLITUDE |
| I   | A   | X(I->A)                  | Y(A->I)   |
| --- | --- | -----                    | -----     |
| 149 | 156 | 0.042536                 | 0.014917  |
| 151 | 156 | 0.092951                 | 0.023714  |
| 154 | 156 | 0.121575                 | 0.017108  |
| 155 | 156 | 0.989223                 | -0.134901 |
| 152 | 160 | 0.034266                 | 0.007201  |
| 155 | 164 | 0.030836                 | 0.018654  |

STATE # 2 ENERGY = 2.800330 EV  
 OSCILLATOR STRENGTH = 0.096614  
 LAMBDA DIAGNOSTIC = 0.547 (RYDBERG/CHARGE TRANSFER CHARACTER)  
 SYMMETRY OF STATE = A

| OCC | VIR | EXCITATION DE-EXCITATION |           |
|-----|-----|--------------------------|-----------|
|     |     | AMPLITUDE                | AMPLITUDE |
| I   | A   | X(I->A)                  | Y(A->I)   |
| --- | --- | -----                    | -----     |
| 143 | 156 | -0.030951                | 0.006587  |
| 152 | 156 | 0.118119                 | -0.003918 |
| 153 | 156 | 0.374287                 | -0.013082 |
| 154 | 156 | 0.902642                 | -0.027064 |
| 155 | 156 | -0.115949                | 0.033891  |
| 152 | 157 | 0.047309                 | 0.009535  |
| 155 | 157 | -0.070261                | -0.005346 |
| 155 | 158 | 0.058163                 | 0.005447  |

STATE # 3 ENERGY = 2.836301 EV  
 OSCILLATOR STRENGTH = 0.027068  
 LAMBDA DIAGNOSTIC = 0.545 (RYDBERG/CHARGE TRANSFER CHARACTER)  
 SYMMETRY OF STATE = A

| OCC | VIR | EXCITATION DE-EXCITATION |           |
|-----|-----|--------------------------|-----------|
|     |     | AMPLITUDE                | AMPLITUDE |
| I   | A   | X(I->A)                  | Y(A->I)   |
| --- | --- | -----                    | -----     |

|     |     |           |           |
|-----|-----|-----------|-----------|
| 144 | 156 | -0.034660 | 0.003273  |
| 150 | 156 | 0.099285  | 0.004206  |
| 151 | 156 | 0.038136  | -0.001303 |
| 152 | 156 | -0.123909 | 0.005140  |
| 153 | 156 | 0.910093  | -0.026539 |
| 154 | 156 | -0.352563 | 0.007645  |
| 155 | 157 | 0.070736  | 0.004679  |
| 151 | 158 | 0.032558  | 0.008318  |
| 152 | 158 | 0.040472  | 0.009593  |
| 155 | 158 | 0.044801  | 0.004026  |
| 155 | 162 | 0.036321  | 0.005956  |

STATE # 4 ENERGY = 3.023182 EV  
 OSCILLATOR STRENGTH = 0.009127  
 LAMBDA DIAGNOSTIC = 0.538 (RYDBERG/CHARGE TRANSFER CHARACTER)  
 SYMMETRY OF STATE = A

| OCC | VIR | EXCITATION | DE-EXCITATION |
|-----|-----|------------|---------------|
|     |     | AMPLITUDE  | AMPLITUDE     |
| I   | A   | X(I->A)    | Y(A->I)       |
| --- | --- | -----      | -----         |
| 151 | 156 | -0.035109  | -0.001269     |
| 152 | 156 | -0.971187  | 0.015044      |
| 153 | 156 | -0.073712  | 0.000720      |
| 154 | 156 | 0.156103   | -0.001493     |
| 155 | 156 | -0.036757  | 0.012891      |
| 154 | 157 | 0.082486   | 0.013790      |
| 155 | 157 | 0.057808   | 0.002465      |
| 153 | 158 | 0.063840   | 0.012182      |
| 155 | 161 | -0.030980  | -0.005551     |

STATE # 5 ENERGY = 3.180731 EV  
 OSCILLATOR STRENGTH = 0.036143  
 LAMBDA DIAGNOSTIC = 0.518 (RYDBERG/CHARGE TRANSFER CHARACTER)  
 SYMMETRY OF STATE = A

| OCC | VIR | EXCITATION | DE-EXCITATION |
|-----|-----|------------|---------------|
|     |     | AMPLITUDE  | AMPLITUDE     |
| I   | A   | X(I->A)    | Y(A->I)       |
| --- | --- | -----      | -----         |
| 149 | 156 | 0.045417   | 0.005982      |
| 150 | 156 | -0.060308  | -0.001077     |
| 151 | 156 | -0.980568  | 0.014407      |
| 153 | 156 | 0.033530   | 0.001775      |
| 154 | 156 | -0.038540  | 0.006094      |
| 155 | 156 | 0.096582   | -0.039442     |



|     |     |           |           |
|-----|-----|-----------|-----------|
| 153 | 157 | 0.039810  | 0.005027  |
| 154 | 157 | -0.045705 | -0.005350 |
| 155 | 157 | -0.056083 | -0.001452 |
| 153 | 158 | 0.081655  | 0.012742  |
| 155 | 161 | 0.034158  | 0.007497  |

SUMMARY OF TDDFT RESULTS

| STATE | ENERGY           | EXCITATION | TRANSITION DIPOLE, A.U. |         |         | OSCILLATOR |
|-------|------------------|------------|-------------------------|---------|---------|------------|
| 0 ->  | HARTREE          | EV         | X                       | Y       | Z       | STRENGTH   |
| 0 A   | -1911.1694365051 | 0.000      |                         |         |         |            |
| 1 A   | -1911.0807635091 | 2.413      | 0.7302                  | -2.5854 | 2.4404  | 0.7787     |
| 2 A   | -1911.0665262754 | 2.800      | -0.3715                 | 0.6657  | -0.9094 | 0.0966     |
| 3 A   | -1911.0652043718 | 2.836      | 0.5063                  | -0.1041 | -0.3498 | 0.0271     |
| 4 A   | -1911.0583365944 | 3.023      | 0.0119                  | 0.2396  | -0.2563 | 0.0091     |
| 5 A   | -1911.0525467771 | 3.181      | 0.1151                  | -0.4252 | 0.5194  | 0.0361     |

  

| TRANSITION | EXCITATION | TRANSITION DIPOLE, A.U. |         |         | OSCILLATOR    |
|------------|------------|-------------------------|---------|---------|---------------|
|            | EV         | X                       | Y       | Z       | DIP STRENGTH  |
| 1 -> 2     | 0.387      | -0.2136                 | 1.1654  | -1.2079 | 1.6920 0.0272 |
| 1 -> 3     | 0.423      | 1.0604                  | -2.2121 | 1.4647  | 2.8571 0.0847 |
| 1 -> 4     | 0.610      | -1.3435                 | 2.6180  | -2.3503 | 3.7660 0.2121 |
| 1 -> 5     | 0.768      | 1.2032                  | 0.1702  | -0.9661 | 1.5525 0.0453 |
| 2 -> 3     | 0.036      | 1.5118                  | -3.6720 | 3.8566  | 5.5356 0.0270 |
| 2 -> 4     | 0.223      | -0.1289                 | -1.5958 | 1.6917  | 2.3292 0.0296 |
| 2 -> 5     | 0.380      | 1.1051                  | -0.7102 | 0.3233  | 1.3529 0.0171 |
| 3 -> 4     | 0.187      | 0.4350                  | -0.5608 | 0.4441  | 0.8372 0.0032 |
| 3 -> 5     | 0.344      | 0.1828                  | 0.1921  | -1.1762 | 1.2058 0.0123 |
| 4 -> 5     | 0.158      | 0.7240                  | -4.6892 | 4.8636  | 6.7947 0.1782 |

SELECTING EXCITED STATE 1 E= -1911.0807635091 AS THE STATE OF INTEREST.

..... DONE WITH TD-DFT EXCITATION ENERGIES .....

STEP CPU TIME = 16660.50 TOTAL CPU TIME = 21018.7 ( 350.3 MIN)

TOTAL WALL CLOCK TIME= 21032.9 SECONDS, CPU UTILIZATION IS 99.93%

TWO-PHOTON ABSORPTION (TPA) CALCULATIONS (A.U.):

EXCITED STATE # 1

SUBCOMPONENT 1 HAS CONVERGED: 17 1.2936E-04  
SUBCOMPONENT 2 HAS CONVERGED: 19 1.8867E-04  
SUBCOMPONENT 3 HAS CONVERGED: 17 1.5992E-04

TPA TRANSITION (SYMMETRIC) TENSOR ELEMENTS (A.U.):

S(1,1) = 14.6149  
S(2,1) = -15.4971  
S(2,2) = -27.0737  
S(3,1) = 8.4093  
S(3,2) = 40.3485  
S(3,3) = -49.6724

DF = (SUM\_{I,J} S(I,I)\*S(J,J))/30 = 128.6765 (A.U.)  
DG = (SUM\_{I,J} S(I,J)\*S(I,J))/30 = 243.0562 (A.U.)

D (LINEAR POLARIZATION) = 2\*DF+4\*DG = 1229.5776 (A.U.)  
D (CIRCULAR POLARIZATION) = -2\*DF+6\*DG = 1200.9841 (A.U.)

R (POLARIZATION RATIO) = (-DF+3\*DG)/(DF+2\*DG) = 0.9767

EXCITED STATE # 2

SUBCOMPONENT 1 HAS CONVERGED: 17 3.4648E-04  
SUBCOMPONENT 2 HAS CONVERGED: 17 1.6886E-04  
SUBCOMPONENT 3 HAS CONVERGED: 21 4.8617E-05

TPA TRANSITION (SYMMETRIC) TENSOR ELEMENTS (A.U.):

S(1,1) = 25.4978

$S(2,1) = -24.3747$   
 $S(2,2) = -48.0591$   
 $S(3,1) = 21.5470$   
 $S(3,2) = 65.0116$   
 $S(3,3) = -86.2918$

$DF = (\text{SUM}_{\{I,J\}} S(I,I)*S(J,J))/30 = 394.9658 \text{ (A.U.)}$   
 $DG = (\text{SUM}_{\{I,J\}} S(I,J)*S(I,J))/30 = 699.1963 \text{ (A.U.)}$

$D \text{ (LINEAR POLARIZATION)} = 2*DF+4*DG = 3586.7170 \text{ (A.U.)}$   
 $D \text{ (CIRCULAR POLARIZATION)} = -2*DF+6*DG = 3405.2464 \text{ (A.U.)}$

$R \text{ (POLARIZATION RATIO)} = (-DF+3*DG)/(DF+2*DG) = 0.9494$

EXCITED STATE # 3

SUBCOMPONENT 1 HAS CONVERGED: 17 3.8664E-04  
 SUBCOMPONENT 2 HAS CONVERGED: 17 1.5654E-04  
 SUBCOMPONENT 3 HAS CONVERGED: 21 2.3365E-05

TPA TRANSITION (SYMMETRIC) TENSOR ELEMENTS (A.U.):

$S(1,1) = 7.0935$   
 $S(2,1) = -39.7642$   
 $S(2,2) = 85.2170$   
 $S(3,1) = 31.7691$   
 $S(3,2) = -43.2514$   
 $S(3,3) = -4.1319$

$DF = (\text{SUM}_{\{I,J\}} S(I,I)*S(J,J))/30 = 259.1821 \text{ (A.U.)}$   
 $DG = (\text{SUM}_{\{I,J\}} S(I,J)*S(I,J))/30 = 541.7216 \text{ (A.U.)}$

$D \text{ (LINEAR POLARIZATION)} = 2*DF+4*DG = 2685.2505 \text{ (A.U.)}$

$$D \text{ (CIRCULAR POLARIZATION)} = -2*DF+6*DG = 2731.9654 \text{ (A.U.)}$$

$$R \text{ (POLARIZATION RATIO)} = (-DF+3*DG)/(DF+2*DG) = 1.0174$$

EXCITED STATE # 4

SUBCOMPONENT 1 HAS CONVERGED: 19 4.7534E-04

SUBCOMPONENT 2 HAS CONVERGED: 17 1.4276E-04

SUBCOMPONENT 3 HAS CONVERGED: 19 6.7998E-05

TPA TRANSITION (SYMMETRIC) TENSOR ELEMENTS (A.U.):

$$S(1,1) = -18.6207$$

$$S(2,1) = 71.8829$$

$$S(2,2) = -169.3061$$

$$S(3,1) = -71.7154$$

$$S(3,2) = 162.4836$$

$$S(3,3) = -155.1447$$

$$DF = (\text{SUM}_{\{I,J\}} S(I,I)*S(J,J))/30 = 3923.2690 \text{ (A.U.)}$$

$$DG = (\text{SUM}_{\{I,J\}} S(I,J)*S(I,J))/30 = 4216.7837 \text{ (A.U.)}$$

$$D \text{ (LINEAR POLARIZATION)} = 2*DF+4*DG = 24713.6727 \text{ (A.U.)}$$

$$D \text{ (CIRCULAR POLARIZATION)} = -2*DF+6*DG = 17454.1642 \text{ (A.U.)}$$

$$R \text{ (POLARIZATION RATIO)} = (-DF+3*DG)/(DF+2*DG) = 0.7063$$

EXCITED STATE # 5

SUBCOMPONENT 1 HAS CONVERGED: 21 9.4567E-05

SUBCOMPONENT 2 HAS CONVERGED: 17 1.6859E-04  
SUBCOMPONENT 3 HAS CONVERGED: 19 6.7151E-05

TPA TRANSITION (SYMMETRIC) TENSOR ELEMENTS (A.U.):

S(1,1) = 17.7558  
S(2,1) = -35.2749  
S(2,2) = -21.7792  
S(3,1) = 19.6189  
S(3,2) = 47.0786  
S(3,3) = -59.2980

DF = (SUM\_{I,J} S(I,I)\*S(J,J))/30 = 133.6534 (A.U.)  
DG = (SUM\_{I,J} S(I,J)\*S(I,J))/30 = 399.9025 (A.U.)

D (LINEAR POLARIZATION) = 2\*DF+4\*DG = 1866.9167 (A.U.)  
D (CIRCULAR POLARIZATION) = -2\*DF+6\*DG = 2132.1083 (A.U.)

R (POLARIZATION RATIO) = (-DF+3\*DG)/(DF+2\*DG) = 1.1420

..... DONE WITH TD-DFT TPA-CROSS SECTIONS .....

Result of B5

#### SINGLET EXCITATIONS

-----

STATE # 1 ENERGY = 2.420341 EV  
OSCILLATOR STRENGTH = 0.356597  
LAMBDA DIAGNOSTIC = 0.540 (RYDBERG/CHARGE TRANSFER CHARACTER)  
SYMMETRY OF STATE = A

| OCC | VIR | EXCITATION | DE-EXCITATION |
|-----|-----|------------|---------------|
|     |     | AMPLITUDE  | AMPLITUDE     |
| I   | A   | X(I->A)    | Y(A->I)       |
| --- | --- | -----      | -----         |
| 160 | 168 | -0.030747  | -0.009487     |
| 162 | 168 | 0.055280   | 0.015743      |
| 164 | 168 | 0.070251   | -0.001519     |
| 165 | 168 | -0.071517  | -0.003907     |
| 166 | 168 | -0.723416  | 0.020337      |
| 167 | 168 | 0.678147   | -0.087362     |

STATE # 2 ENERGY = 2.453279 EV  
 OSCILLATOR STRENGTH = 0.487828  
 LAMBDA DIAGNOSTIC = 0.558 (RYDBERG/CHARGE TRANSFER CHARACTER)  
 SYMMETRY OF STATE = A

| OCC | VIR | EXCITATION | DE-EXCITATION |
|-----|-----|------------|---------------|
|     |     | AMPLITUDE  | AMPLITUDE     |
| I   | A   | X(I->A)    | Y(A->I)       |
| --- | --- | -----      | -----         |
| 160 | 168 | -0.032445  | -0.010378     |
| 162 | 168 | 0.064858   | 0.016833      |
| 164 | 168 | -0.097353  | -0.001381     |
| 165 | 168 | -0.042435  | -0.005692     |
| 166 | 168 | 0.674916   | -0.024151     |
| 167 | 168 | 0.726341   | -0.099153     |
| 161 | 171 | -0.031404  | -0.010789     |

STATE # 3 ENERGY = 2.753295 EV  
 OSCILLATOR STRENGTH = 0.071275  
 LAMBDA DIAGNOSTIC = 0.642 (RYDBERG/CHARGE TRANSFER CHARACTER)  
 SYMMETRY OF STATE = A

| OCC | VIR | EXCITATION | DE-EXCITATION |
|-----|-----|------------|---------------|
|     |     | AMPLITUDE  | AMPLITUDE     |
| I   | A   | X(I->A)    | Y(A->I)       |
| --- | --- | -----      | -----         |
| 155 | 168 | 0.033488   | -0.006921     |
| 164 | 168 | -0.084809  | 0.001925      |
| 165 | 168 | -0.985768  | 0.035449      |
| 167 | 168 | -0.086964  | 0.022273      |
| 163 | 169 | 0.034927   | 0.008829      |
| 167 | 170 | 0.066044   | 0.008729      |

STATE # 4 ENERGY = 2.884975 EV  
 OSCILLATOR STRENGTH = 0.072543

LAMBDA DIAGNOSTIC = 0.637 (RYDBERG/CHARGE TRANSFER CHARACTER)

SYMMETRY OF STATE = A

| OCC<br>I | VIR<br>A | EXCITATION           | DE-EXCITATION        |
|----------|----------|----------------------|----------------------|
|          |          | AMPLITUDE<br>X(I->A) | AMPLITUDE<br>Y(A->I) |
| ---      | ---      | -----                | -----                |
| 156      | 168      | 0.035038             | 0.000201             |
| 161      | 168      | 0.045953             | 0.000164             |
| 163      | 168      | 0.036923             | 0.001964             |
| 164      | 168      | 0.976475             | -0.032270            |
| 165      | 168      | -0.082260            | 0.003739             |
| 166      | 168      | 0.115419             | -0.006649            |
| 162      | 169      | 0.034130             | 0.009234             |
| 167      | 169      | 0.087548             | 0.007535             |
| 163      | 170      | 0.042060             | 0.010105             |
| 165      | 171      | 0.030174             | 0.018943             |
| 167      | 173      | 0.050674             | 0.007518             |

STATE # 5 ENERGY = 3.117476 EV

OSCILLATOR STRENGTH = 0.007567

LAMBDA DIAGNOSTIC = 0.484 (RYDBERG/CHARGE TRANSFER CHARACTER)

SYMMETRY OF STATE = A

| OCC<br>I | VIR<br>A | EXCITATION           | DE-EXCITATION        |
|----------|----------|----------------------|----------------------|
|          |          | AMPLITUDE<br>X(I->A) | AMPLITUDE<br>Y(A->I) |
| ---      | ---      | -----                | -----                |
| 161      | 168      | 0.038935             | 0.006667             |
| 163      | 168      | 0.987685             | -0.010345            |
| 164      | 168      | -0.034610            | 0.002803             |
| 165      | 169      | 0.074028             | 0.013138             |
| 164      | 170      | -0.066885            | -0.012293            |
| 165      | 170      | 0.053642             | 0.009731             |
| 162      | 171      | 0.032204             | -0.003266            |

#### SUMMARY OF TDDFT RESULTS

| STATE<br>0-> | ENERGY<br>HARTREE | EXCITATION<br>EV | TRANSITION DIPOLE, A.U. |         |         | OSCILLATOR<br>STRENGTH |
|--------------|-------------------|------------------|-------------------------|---------|---------|------------------------|
|              |                   |                  | X                       | Y       | Z       |                        |
| 0 A          | -2045.0181410621  | 0.000            |                         |         |         |                        |
| 1 A          | -2044.9291951460  | 2.420            | -1.7650                 | -1.6105 | -0.5520 | 0.3566                 |
| 2 A          | -2044.9279847104  | 2.453            | -0.5879                 | -2.6653 | -0.8167 | 0.4878                 |
| 3 A          | -2044.9169593389  | 2.753            | 0.5835                  | 0.6186  | 0.5775  | 0.0713                 |
| 4 A          | -2044.9121201863  | 2.885            | 0.7819                  | -0.6136 | -0.1959 | 0.0725                 |
| 5 A          | -2044.9035759173  | 3.117            | -0.2561                 | 0.1767  | 0.0475  | 0.0076                 |

| TRANSITION | EXCITATION<br>EV | TRANSITION DIPOLE, A.U. |         |         | OSCILLATOR |          |
|------------|------------------|-------------------------|---------|---------|------------|----------|
|            |                  | X                       | Y       | Z       | DIP        | STRENGTH |
| 1 -> 2     | 0.033            | 3.5386                  | -1.8482 | -0.3813 | 4.0104     | 0.0130   |
| 1 -> 3     | 0.333            | -0.0886                 | -1.3550 | -0.5348 | 1.4594     | 0.0174   |
| 1 -> 4     | 0.465            | -0.1755                 | -1.7202 | -0.2391 | 1.7456     | 0.0347   |
| 1 -> 5     | 0.697            | -1.9301                 | -1.2411 | -0.7151 | 2.4035     | 0.0987   |
| 2 -> 3     | 0.300            | 0.7239                  | 0.3641  | 0.3890  | 0.8988     | 0.0059   |
| 2 -> 4     | 0.432            | -1.7053                 | -1.5975 | -0.2743 | 2.3527     | 0.0585   |
| 2 -> 5     | 0.664            | -0.3912                 | -2.2937 | -0.9133 | 2.4997     | 0.1017   |
| 3 -> 4     | 0.132            | -2.7356                 | -5.0124 | -1.9042 | 6.0194     | 0.1169   |
| 3 -> 5     | 0.364            | 0.6170                  | 2.0324  | 0.2450  | 2.1380     | 0.0408   |
| 4 -> 5     | 0.233            | -0.9510                 | -0.2408 | -0.2291 | 1.0075     | 0.0058   |

SELECTING EXCITED STATE 1 E= -2044.9291951460 AS THE STATE OF INTEREST.

..... DONE WITH TD-DFT EXCITATION ENERGIES .....

STEP CPU TIME = 20507.61 TOTAL CPU TIME = 25686.3 ( 428.1 MIN)

TOTAL WALL CLOCK TIME= 25702.3 SECONDS, CPU UTILIZATION IS 99.94%

TWO-PHOTON ABSORPTION (TPA) CALCULATIONS (A.U.):

EXCITED STATE # 1

SUBCOMPONENT 1 HAS CONVERGED: 19 6.8027E-05

SUBCOMPONENT 2 HAS CONVERGED: 99 4.6498E-04

SUBCOMPONENT 3 HAS CONVERGED: 15 1.4285E-04

TPA TRANSITION (SYMMETRIC) TENSOR ELEMENTS (A.U.):

S(1,1) = 54.0954

S(2,1) = -109.5086

S(2,2) = 14.8455

S(3,1) = -32.3275

S(3,2) = -5.8039



$$S(3,3) = -6.8450$$

$$DF = (\text{SUM}_{\{I,J\}} S(I,I)*S(J,J))/30 = 128.5301 \text{ (A.U.)}$$

$$DG = (\text{SUM}_{\{I,J\}} S(I,J)*S(I,J))/30 = 977.8432 \text{ (A.U.)}$$

$$D \text{ (LINEAR POLARIZATION)} = 2*DF+4*DG = 4168.4331 \text{ (A.U.)}$$

$$D \text{ (CIRCULAR POLARIZATION)} = -2*DF+6*DG = 5609.9993 \text{ (A.U.)}$$

$$R \text{ (POLARIZATION RATIO)} = (-DF+3*DG)/(DF+2*DG) = 1.3458$$

#### EXCITED STATE # 2

SUBCOMPONENT 1 HAS CONVERGED: 19 6.0595E-05

SUBCOMPONENT 2 HAS CONVERGED: 21 1.7464E-05

SUBCOMPONENT 3 HAS CONVERGED: 15 1.4629E-04

#### TPA TRANSITION (SYMMETRIC) TENSOR ELEMENTS (A.U.):

$$S(1,1) = -115.2470$$

$$S(2,1) = 55.3137$$

$$S(2,2) = 44.8453$$

$$S(3,1) = 15.8397$$

$$S(3,2) = 18.9228$$

$$S(3,3) = 9.6215$$

$$DF = (\text{SUM}_{\{I,J\}} S(I,I)*S(J,J))/30 = 123.1408 \text{ (A.U.)}$$

$$DG = (\text{SUM}_{\{I,J\}} S(I,J)*S(I,J))/30 = 757.4235 \text{ (A.U.)}$$

$$D \text{ (LINEAR POLARIZATION)} = 2*DF+4*DG = 3275.9756 \text{ (A.U.)}$$

$$D \text{ (CIRCULAR POLARIZATION)} = -2*DF+6*DG = 4298.2594 \text{ (A.U.)}$$

$$R \text{ (POLARIZATION RATIO)} = (-DF+3*DG)/(DF+2*DG) = 1.3121$$

EXCITED STATE # 3

SUBCOMPONENT 1 HAS CONVERGED: 19 3.8694E-05  
SUBCOMPONENT 2 HAS CONVERGED: 19 7.8057E-05  
SUBCOMPONENT 3 HAS CONVERGED: 15 2.0640E-04

TPA TRANSITION (SYMMETRIC) TENSOR ELEMENTS (A.U.):

S(1,1) = -57.6966  
S(2,1) = -32.1087  
S(2,2) = 59.6488  
S(3,1) = -17.7858  
S(3,2) = 9.6400  
S(3,3) = -1.0374

DF = (SUM\_{I,J} S(I,I)\*S(J,J))/30 = 0.0279 (A.U.)  
DG = (SUM\_{I,J} S(I,J)\*S(I,J))/30 = 325.6139 (A.U.)

D (LINEAR POLARIZATION) = 2\*DF+4\*DG = 1302.5115 (A.U.)  
D (CIRCULAR POLARIZATION) = -2\*DF+6\*DG = 1953.6278 (A.U.)

R (POLARIZATION RATIO) = (-DF+3\*DG)/(DF+2\*DG) = 1.4999

EXCITED STATE # 4

SUBCOMPONENT 1 HAS CONVERGED: 17 4.4806E-04  
SUBCOMPONENT 2 HAS CONVERGED: 17 3.3941E-04  
SUBCOMPONENT 3 HAS CONVERGED: 15 2.5228E-04

TPA TRANSITION (SYMMETRIC) TENSOR ELEMENTS (A.U.):

S(1,1) = 2.6466  
S(2,1) = 66.3183  
S(2,2) = 68.2211  
S(3,1) = 2.7483  
S(3,2) = -9.2101  
S(3,3) = -16.7200

DF = (SUM\_{I,J} S(I,I)\*S(J,J))/30 = 97.7322 (A.U.)

DG = (SUM\_{I,J} S(I,J)\*S(I,J))/30 = 464.0556 (A.U.)

D (LINEAR POLARIZATION) = 2\*DF+4\*DG = 2051.6867 (A.U.)

D (CIRCULAR POLARIZATION) = -2\*DF+6\*DG = 2588.8690 (A.U.)

R (POLARIZATION RATIO) = (-DF+3\*DG)/(DF+2\*DG) = 1.2618

EXCITED STATE # 5

SUBCOMPONENT 1 HAS CONVERGED: 19 7.5322E-05

SUBCOMPONENT 2 HAS CONVERGED: 17 4.6232E-04

SUBCOMPONENT 3 HAS CONVERGED: 17 1.0541E-04

TPA TRANSITION (SYMMETRIC) TENSOR ELEMENTS (A.U.):

S(1,1) = 99.4449  
S(2,1) = 107.4230  
S(2,2) = 230.1245  
S(3,1) = 43.4204  
S(3,2) = 91.4765  
S(3,3) = 32.4574

DF = (SUM\_{I,J} S(I,I)\*S(J,J))/30 = 4368.7786 (A.U.)

$$DG = (\text{SUM}_{\{I,J\}} S(I,J)*S(I,J))/30 = 3582.8675 \text{ (A.U.)}$$

$$D \text{ (LINEAR POLARIZATION)} = 2*DF+4*DG = 23069.0274 \text{ (A.U.)}$$

$$D \text{ (CIRCULAR POLARIZATION)} = -2*DF+6*DG = 12759.6478 \text{ (A.U.)}$$

$$R \text{ (POLARIZATION RATIO)} = (-DF+3*DG)/(DF+2*DG) = 0.5531$$

..... DONE WITH TD-DFT TPA-CROSS SECTIONS .....
